# Supplementary material
Source: PubMed Central journal article supplement (PMC2538447)
Supplement: NIHMS64015-supplement-2si20051022_09.pdf [file NIHMS64015-supplement-2si20051022_09.pdf]

# Cucurbit[10]uril – Supporting Information

Simin Liu, Peter Y. Zavalij, and Lyle Isaacs\*

Department of Chemistry and Biochemistry, University of Maryland College Park, MD 20742

| Table of Contents                                                                                                                                                                                                                                                       | Pages     |
|-------------------------------------------------------------------------------------------------------------------------------------------------------------------------------------------------------------------------------------------------------------------------|-----------|
| Table of contents                                                                                                                                                                                                                                                       | S1        |
| Experimental section                                                                                                                                                                                                                                                    | S2        |
| <sup>1</sup> H NMR spectra of CB[10]•CB[5] in DCI / D <sub>2</sub> O (0 – 35%)                                                                                                                                                                                          | S3        |
| <sup>1</sup> H NMR Spectra for ( <i>R</i> )- <b>2</b> , CB[10]•( <i>R</i> )- <b>2</b> <sub>2</sub> and a mixture of CB[10]•( <i>R</i> )- <b>2</b> <sub>2</sub> , CB[10]•( <i>S</i> )- <b>2</b> <sub>2</sub> , and CB[10]•( <i>R</i> )- <b>2</b> •( <i>S</i> )- <b>2</b> | S4        |
| Variable Temperature NMR for the mixture of CB[10]• <b>1,3-alt-3</b> and CB[10]• <i>cone/1,2-alt/partial cone-3</i>                                                                                                                                                     | S5        |
| Molecular Models for CB[10]• <b>1,3-alt-3</b> , CB[10]• <i>cone-3</i> , CB[10]• <i>1,2-alt-3</i> , and CB[10]• <i>partial cone-3</i>                                                                                                                                    | S6        |
| <sup>1</sup> H NMR Spectra for CB[10]• <b>3</b> •Adamantanes ( <b>5 – 8</b> )                                                                                                                                                                                           | S7 – S10  |
| Selected spectra for CB[10]•guest binding                                                                                                                                                                                                                               | S11 – S20 |
| Chemical structures of additional guests that remain soluble but do not form complexes with CB[10]                                                                                                                                                                      | S21       |
| Chemical structures of additional guests that form insoluble precipitates with CB[10]                                                                                                                                                                                   | S21       |
| Details of the x-ray structure of CB[10]• <b>1</b> <sub>2</sub>                                                                                                                                                                                                         | S22 – S24 |

## Experimental Section.

**General.** The guests used in this study were purchased from commercial suppliers and were used without further purification. Compound **1** and CB[10]•CB[5] were prepared by the literature procedures.<sup>1</sup> Melting points were measured on a Meltemp apparatus in open capillary tubes and are uncorrected. IR spectra were recorded on a commercial spectrophotometers as KBr pellets and are reported in  $\text{cm}^{-1}$ . NMR spectra were measured on spectrometers operating at 400 or 500 MHz for  $^1\text{H}$  and 100 or 125 MHz for  $^{13}\text{C}$ . Mass spectrometry was performed using a VG 7070E magnetic sector instrument by fast atom bombardment (FAB) using the indicated matrix or on a JEOL AccuTOF electrospray instrument. Computational results were obtained using Spartan 02 running on a Macintosh personal computer.

**Preparation, Purification and Characterization of CB[10].** A mixture of CB[10]•CB[5] (2.10 g, 0.78 mmol) and **1** (2.20 g, 3.89 mmol) in water (500 mL) was heated at 90 °C for 30 min. The solution was allowed to cool and the solid (935 mg, contains CB[5]•**1**, CB[10]•CB[5], and CB[10]•**1**.) removed by filtration. The solution was concentrated to 120 mL and allowed to stand in the refrigerator for 2 h and filtered to give CB[5]•**1** (40 mg). The solution was then concentrated to dryness. The resulting solid was repeatedly washed with MeOH (150 mL portions) which gave CB[10]•**1** as a white solid (1.18 g, 0.53 mmol, 68%). A suspension of CB[10]•**1** (1.12 g, 0.50 mmol) in acetic anhydride (30 mL) was heated at 100 °C for 16 h. The precipitate was removed by centrifugation and washed repeatedly with small portions of MeOH (20 mL portions), DMSO (20 mL portions), and H<sub>2</sub>O (20 mL portions). Drying at high vacuum gave CB[10] (610 mg, 0.367 mmol, 73%).

CB[10]. White solid. M.p. > 300 °C. IR (KBr,  $\text{cm}^{-1}$ ): 3445s, 2998w, 2924w, 2850w, 1724s, 1636m, 1468m, 1374m, 1313m, 1226s, 1189m, 1160w, 974m, 810s.  $^1\text{H}$  NMR (400 MHz, 20% DCl / D<sub>2</sub>O): 5.50 (d,  $J = 15.1$ , 20H), 5.44 (s, 20H), 4.10 (d,  $J = 15.1$ , 20H).  $^{13}\text{C}$  NMR (125 MHz, 20% DCl / D<sub>2</sub>O): 159.2, 74.6, 56.9. MS (ES):  $m/z$  831 (100,  $[\text{M} + 2\text{H}]^{2+}$ ,  $m/z$  spacing = 0.5 confirmed for molecular ion). HR-MS (ES):  $m/z$  831.2504 ( $[\text{M} + 2\text{H}]^{2+}$ ,  $(\text{C}_{60}\text{H}_{62}\text{N}_{40}\text{O}_{20})/2$ , calcd 831.2532).

### References:

(1) (a) Liu, S.-M.; Ruspic, C.; Mukhopadhyay, P.; Chakrabarti, S.; Zavalij, P.; Isaacs, L. *J. Am. Chem. Soc.* **2005**, *127*, ASAP. (b) Day, A. I.; Arnold, A. P.; Blanch, R. J.; Snushall, B. *J. Org. Chem.* **2001**, *66*, 8094-8100. (c) Day, A. I.; Blanch, R. J.; Arnold, A. P.; Lorenzo, S.; Lewis, G. R.; Dance, I. *Angew. Chem. Int. Ed.* **2002**, *41*, 275-277.

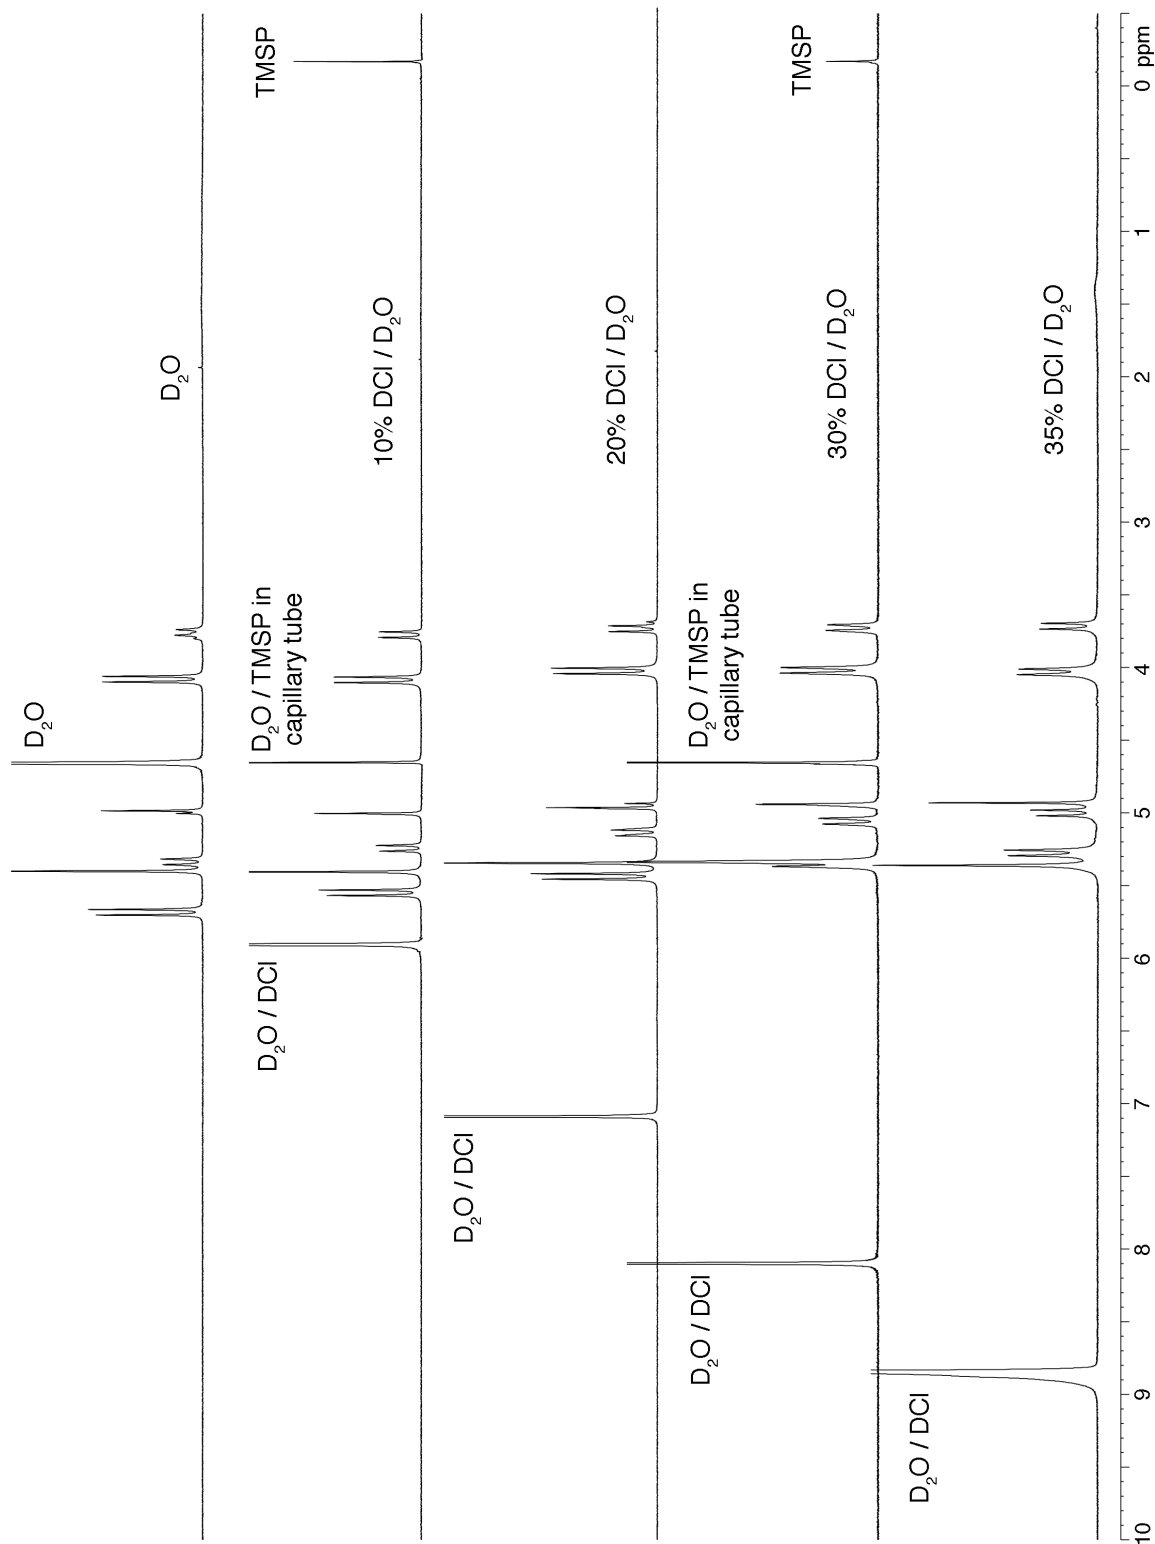

**Figure S1.**  $^1\text{H}$  NMR spectrum recorded CB[10]•CB[5] (400 MHz, RT) in DCI /  $\text{D}_2\text{O}$  (0 – 35%). We attribute the small additional set of peaks to the ability of CB[5] to bind chloride ion as demonstrated by Day and co-workers. TMSP =  $\text{Me}_3\text{SiCD}_2\text{CD}_2\text{CO}_2\text{H}$ .

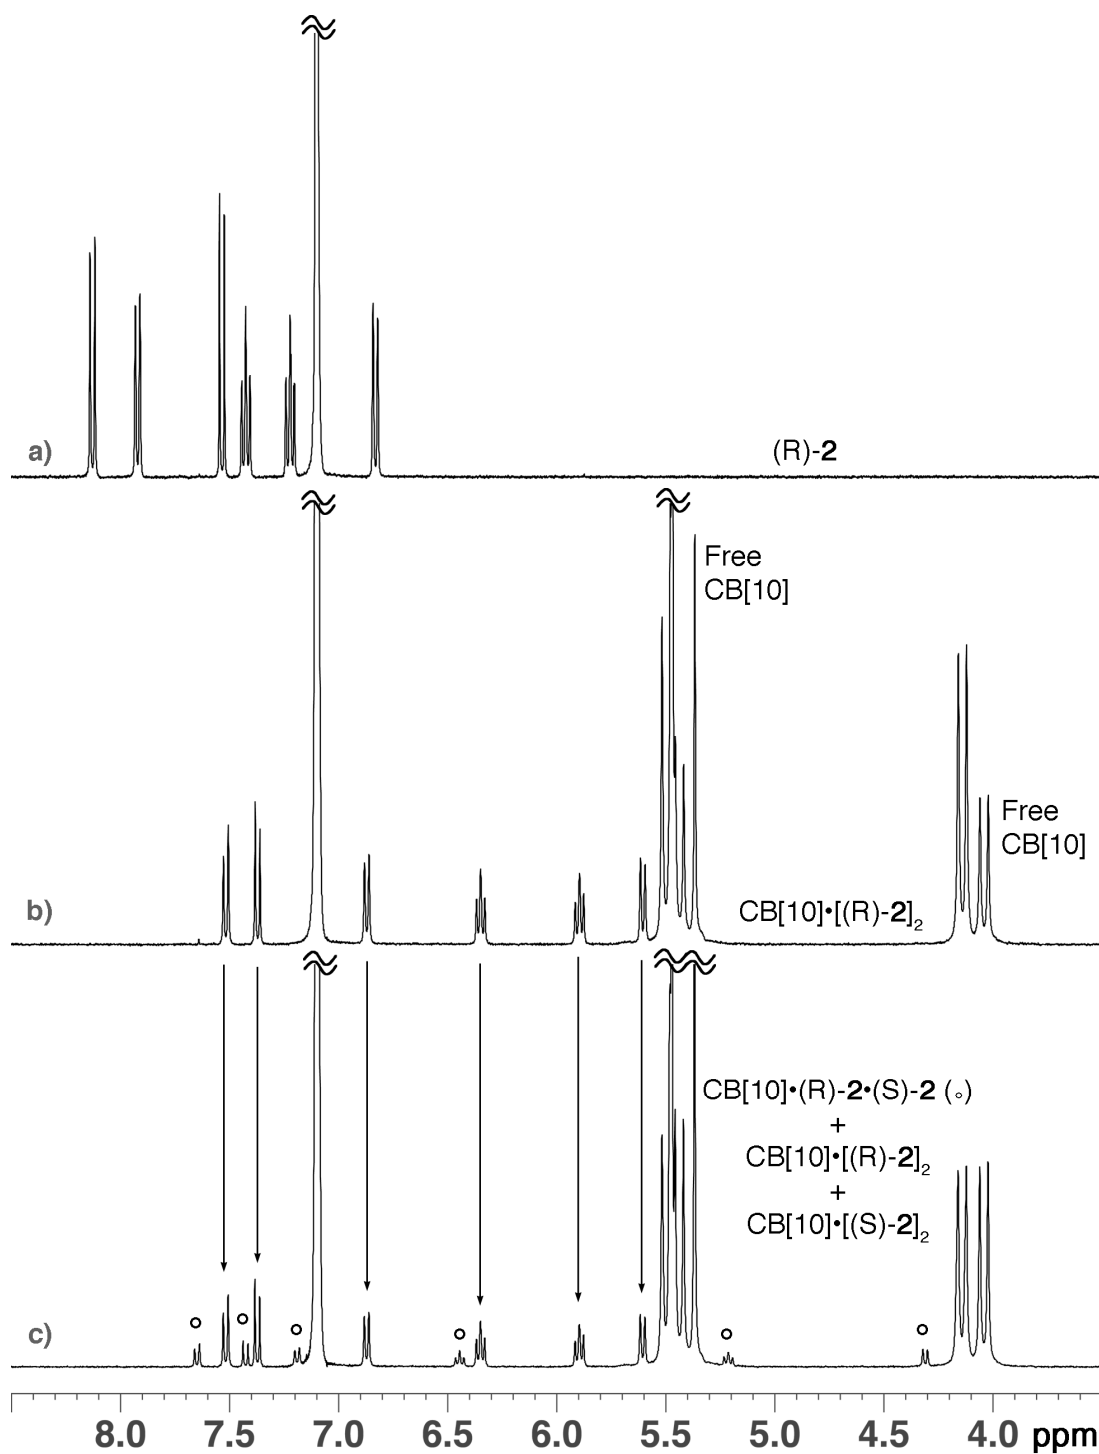

**Figure S2.** <sup>1</sup>H NMR spectra recorded (400 MHz, 20 % DCl / D<sub>2</sub>O, RT) for: a) (*R*)-**2** alone, b) a mixture of free CB[10] and CB[10]•[(*R*)-**2**]<sub>2</sub> prepared from CB[10] and (*R*)-**2**, and c) a mixture of the racemate (CB[10]•[(*R*)-**2**]<sub>2</sub> and CB[10]•[(*S*)-**2**]<sub>2</sub>) and the *meso*-complex CB[10]•(*R*)-**2**•(*S*)-**2** (resonances indicated with “o”) prepared from CB[10] and (±)-**2**. Integration indicates the racemate to *meso*-complex ratio is 3:1.

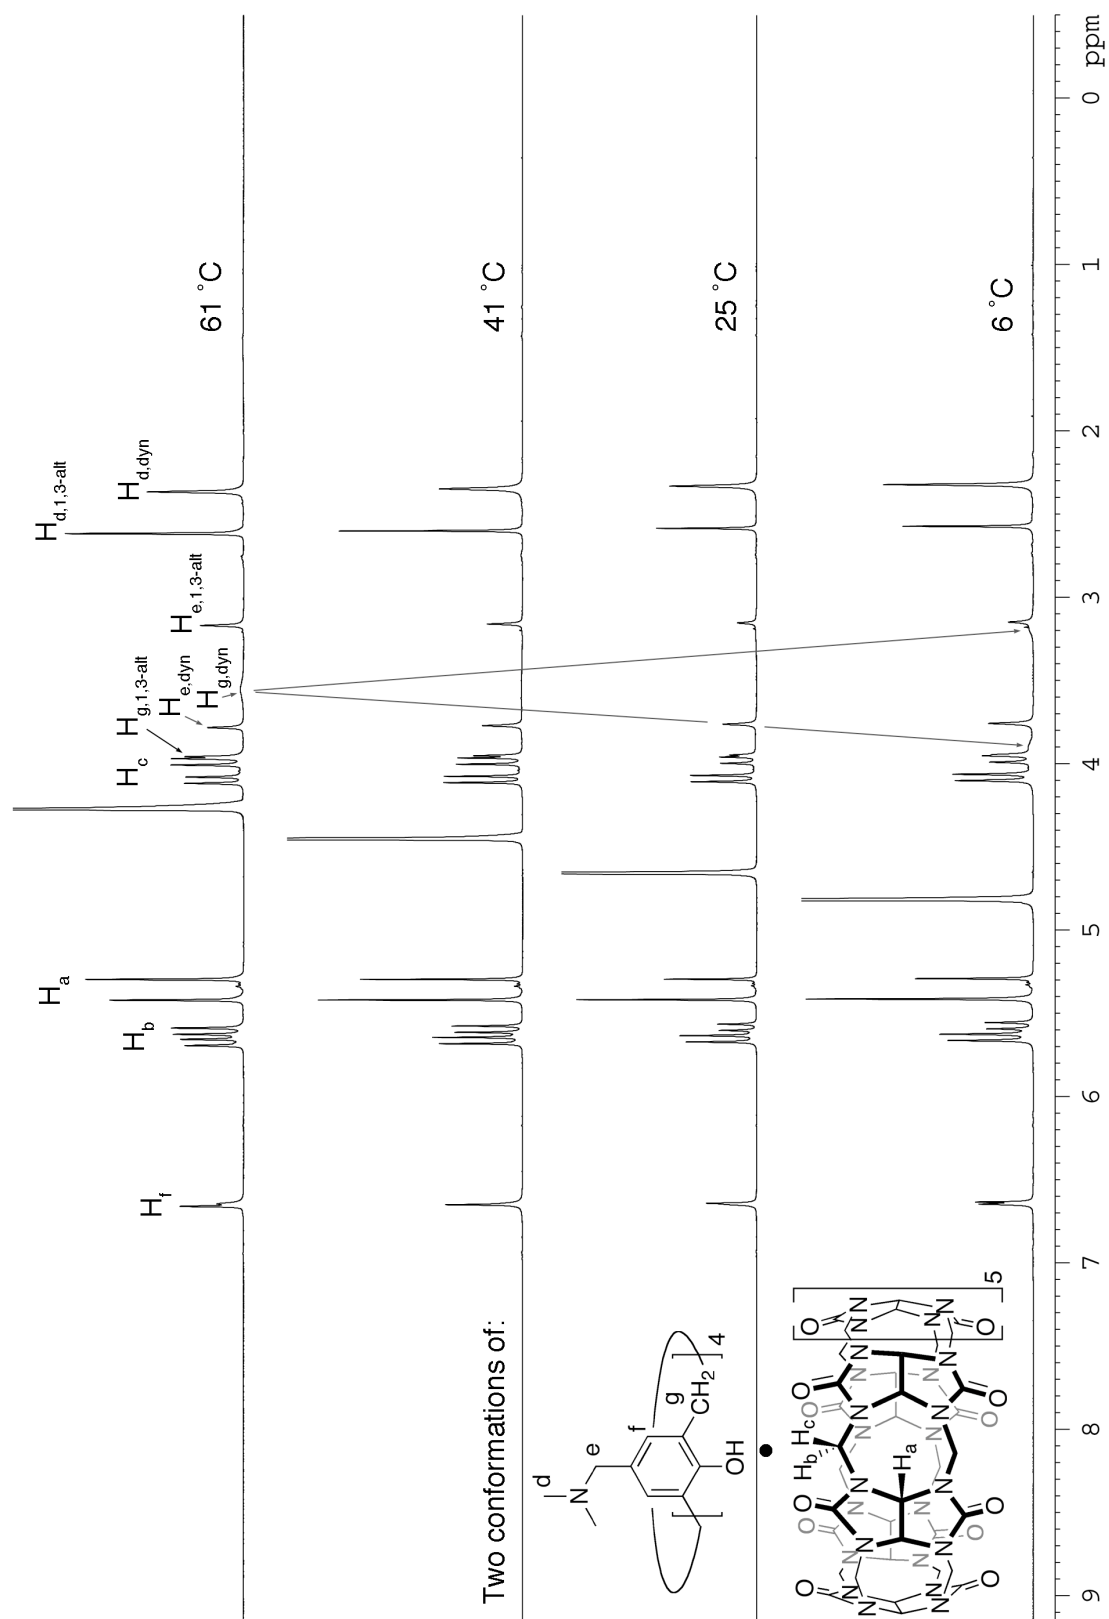

**Figure S3.** Variable temperature <sup>1</sup>H NMR spectra recorded CB[10]•3 (400 MHz, D<sub>2</sub>O / DCl). The subscript “dyn” refers to the dynamic mixture of cone, 1,2-alternate, and partial cone conformations.

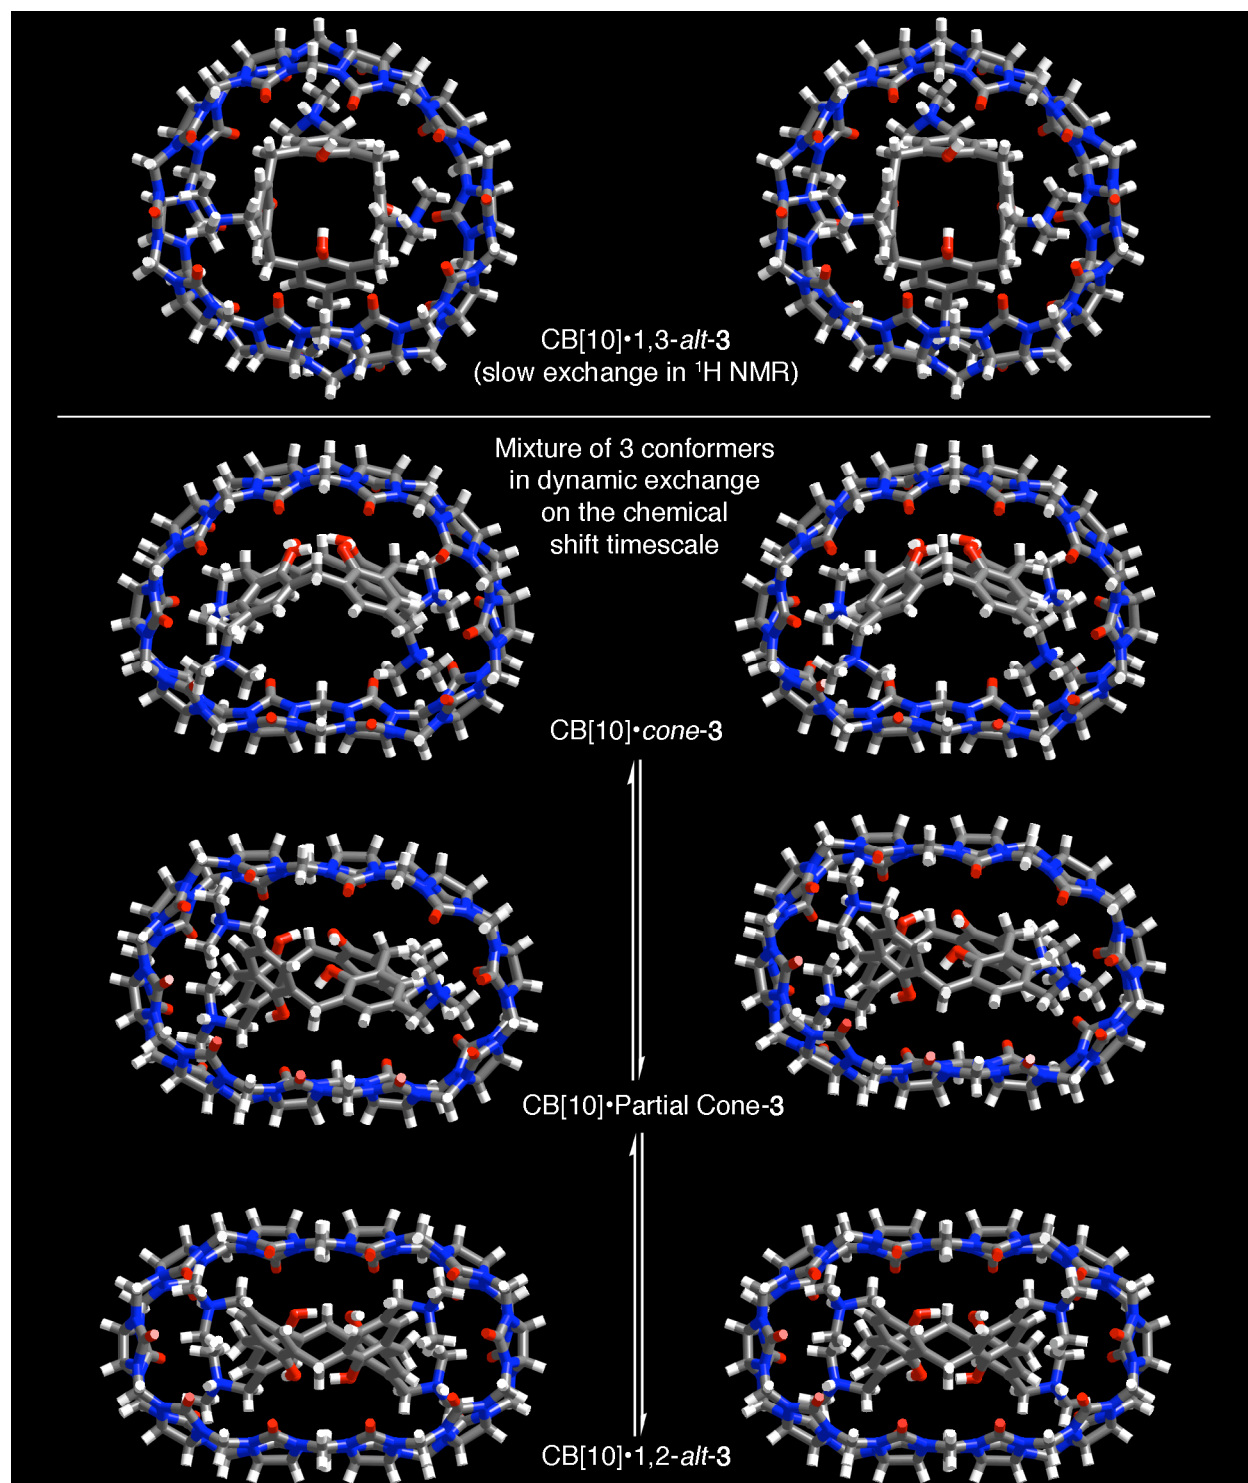

**Scheme S1.** Cross-eyed stereoviews of the MMFF minimized structures of CB[10]•1,3-*alt*-3, CB[10]•*cone*-3, CB[10]•1,2-*alt*-3, and CB[10]•*partial cone*-3 rendered with CrystalMaker.

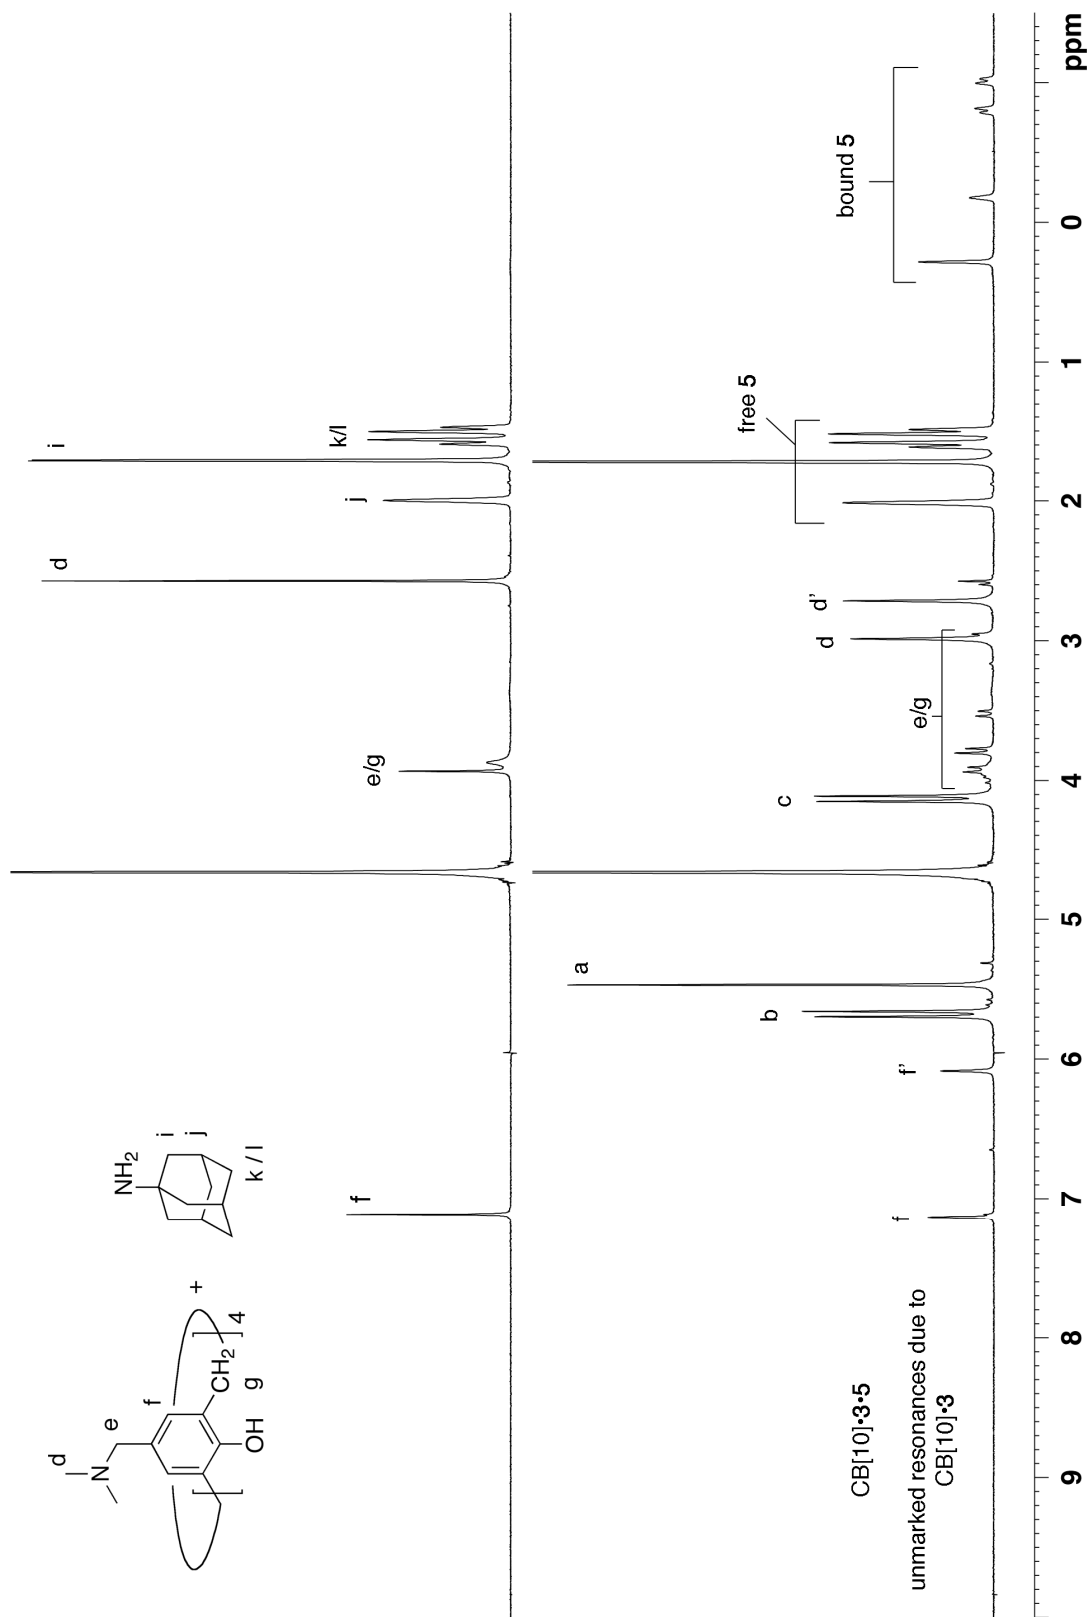

**Figure S4.**  $^1\text{H}$  NMR spectra recorded (400 MHz, RT,  $\text{D}_2\text{O}$ ) for: (left) a mixture of **3** and **5**, and (right)  $\text{CB}[10]\cdot\mathbf{3}\cdot\mathbf{5}$  with excess **5**.

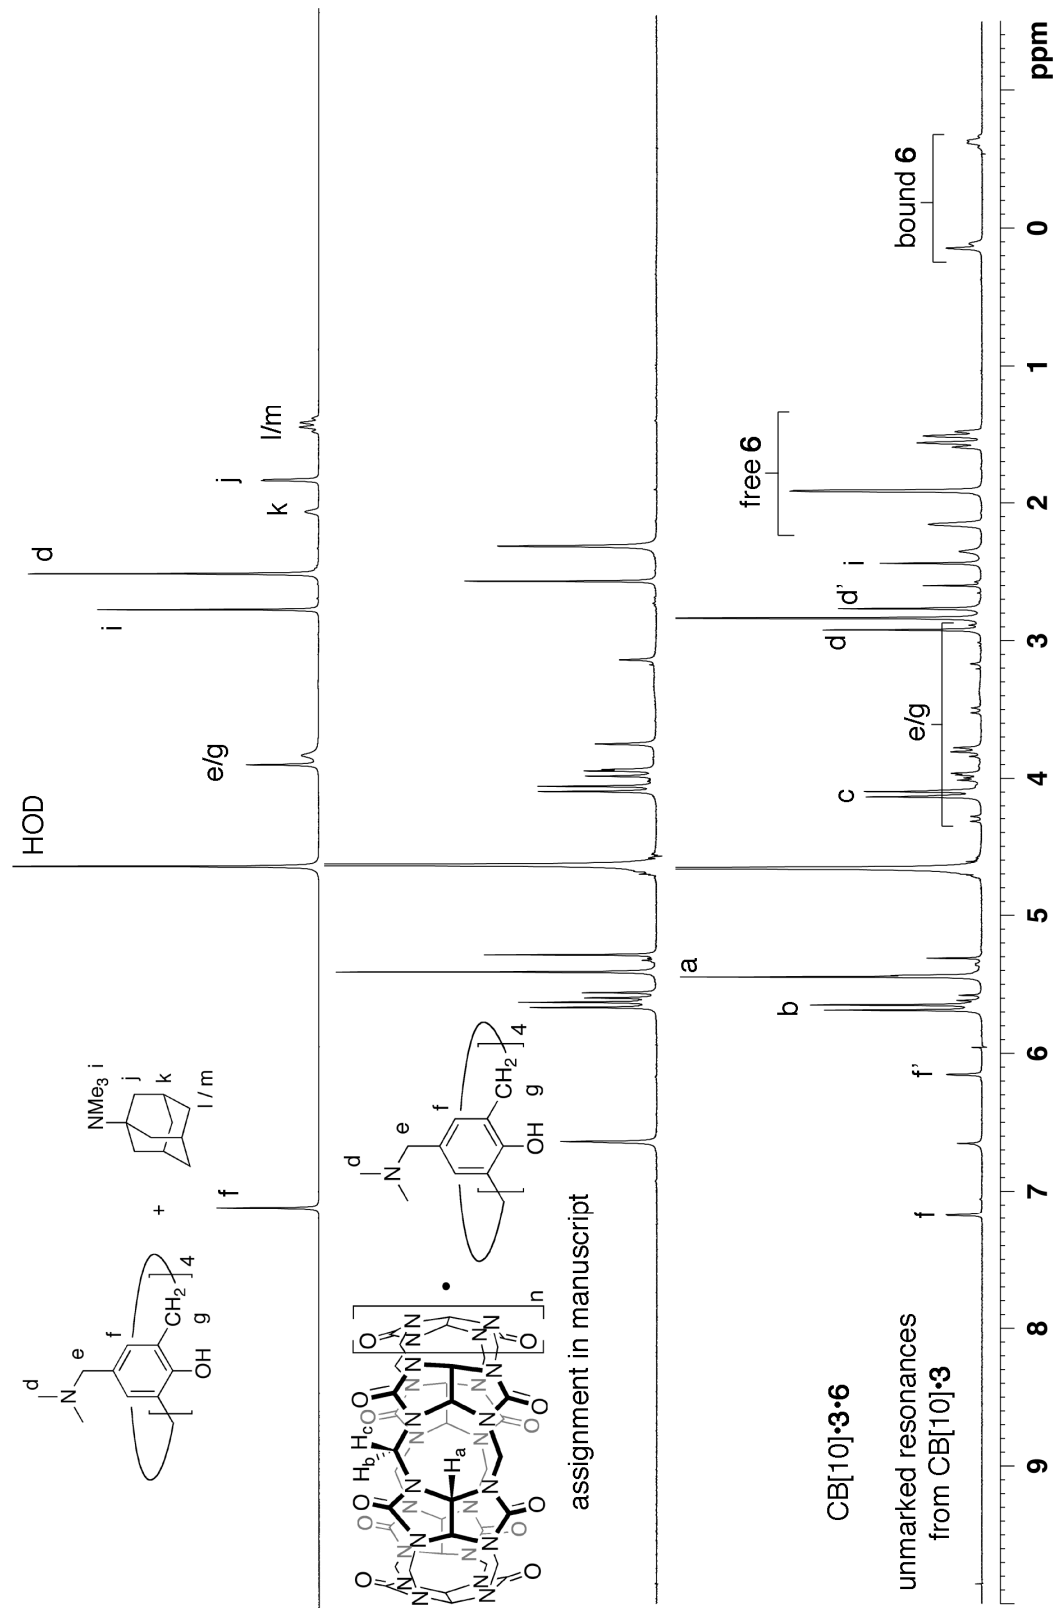

**Figure S5.**  $^1\text{H}$  NMR spectra recorded (400 MHz, RT,  $\text{D}_2\text{O}$ ) for: (left) a mixture of **3** and **6**, (middle)  $\text{CB}[10]\cdot\mathbf{3}$ , and (right)  $\text{CB}[10]\cdot\mathbf{3}\cdot\mathbf{6}$  with excess **6**.





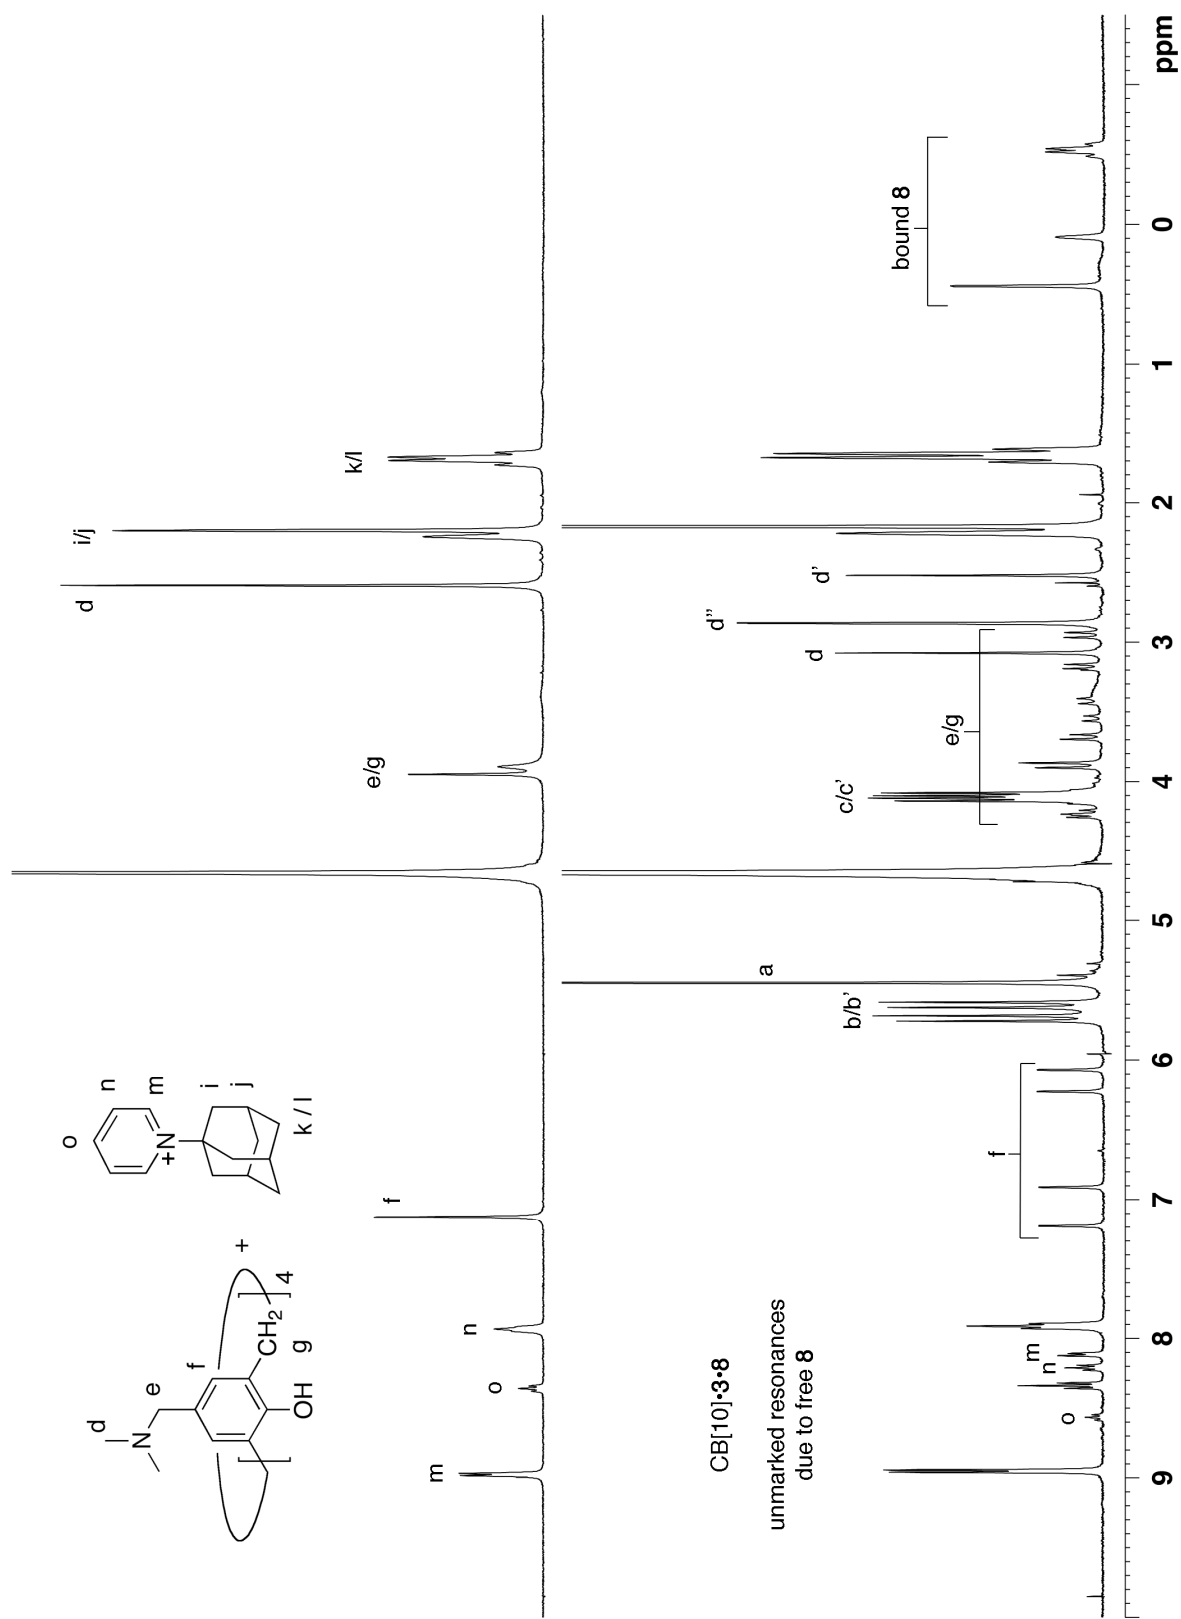

**Figure S7.**  $^1\text{H}$  NMR spectra recorded (400 MHz, RT,  $\text{D}_2\text{O}$ ) for: (left) a mixture of **3** and **8** and (right)  $\text{CB}[10]\cdot\mathbf{3}\cdot\mathbf{8}$  with excess **8**.

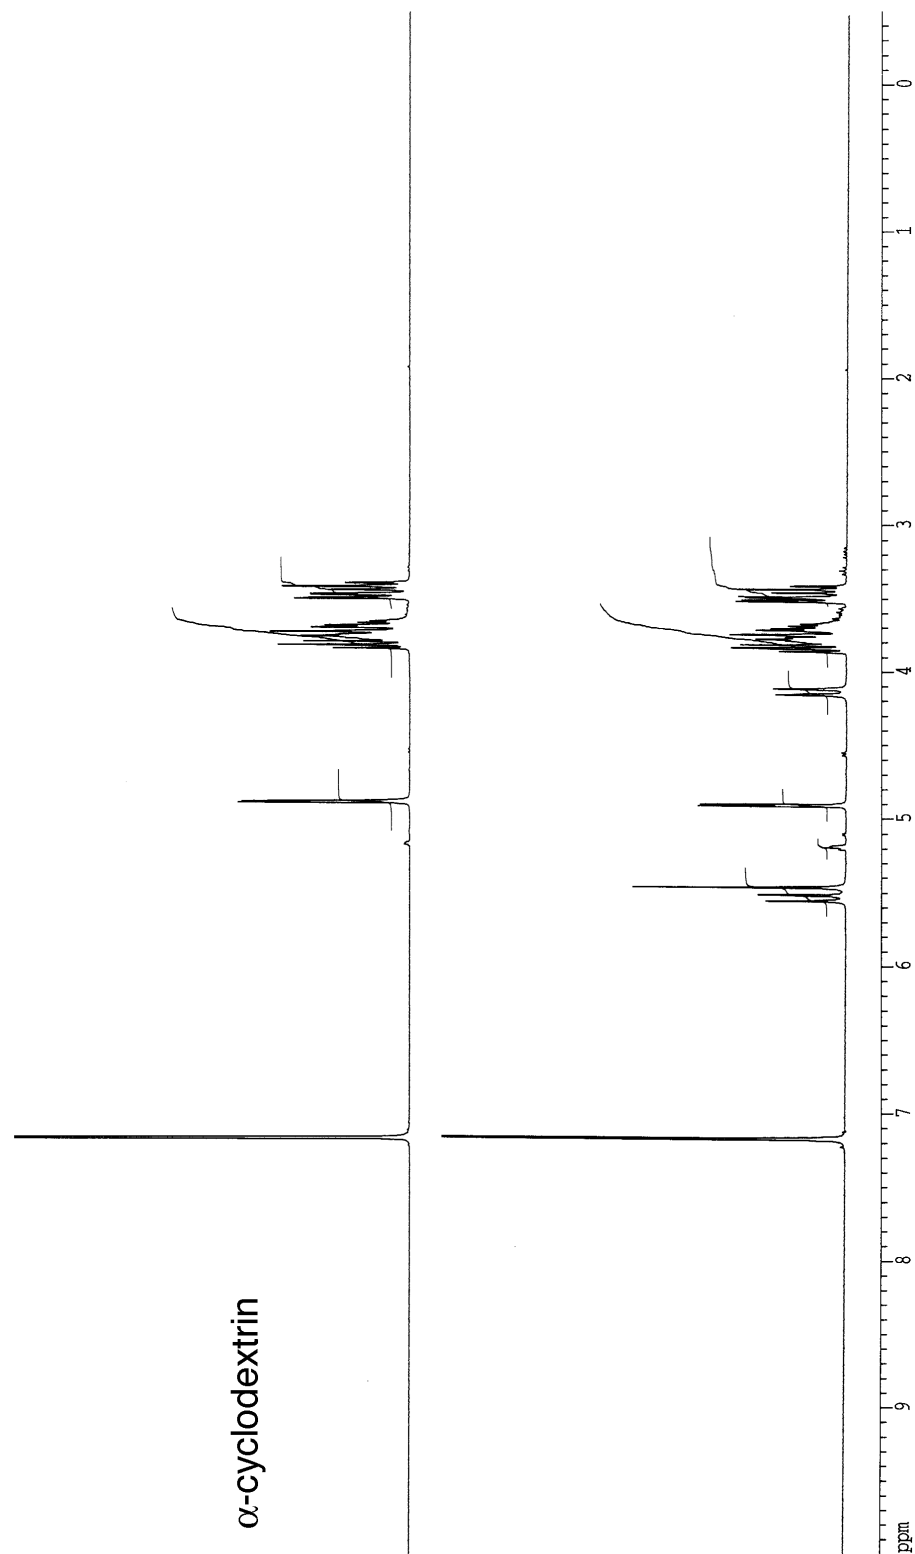

**Figure S8.** <sup>1</sup>H NMR spectrum recorded (400 MHz, RT, 20% DCl / D<sub>2</sub>O) for α-cyclodextrin and a mixture of α-cyclodextrin and CB[10]. The small resonances at ≈ 3.2–3.3 and 4.6 ppm are impurities in the commercially available α-cyclodextrin. α-Cyclodextrin and CB[10] remain in their free states and do not form a complex.

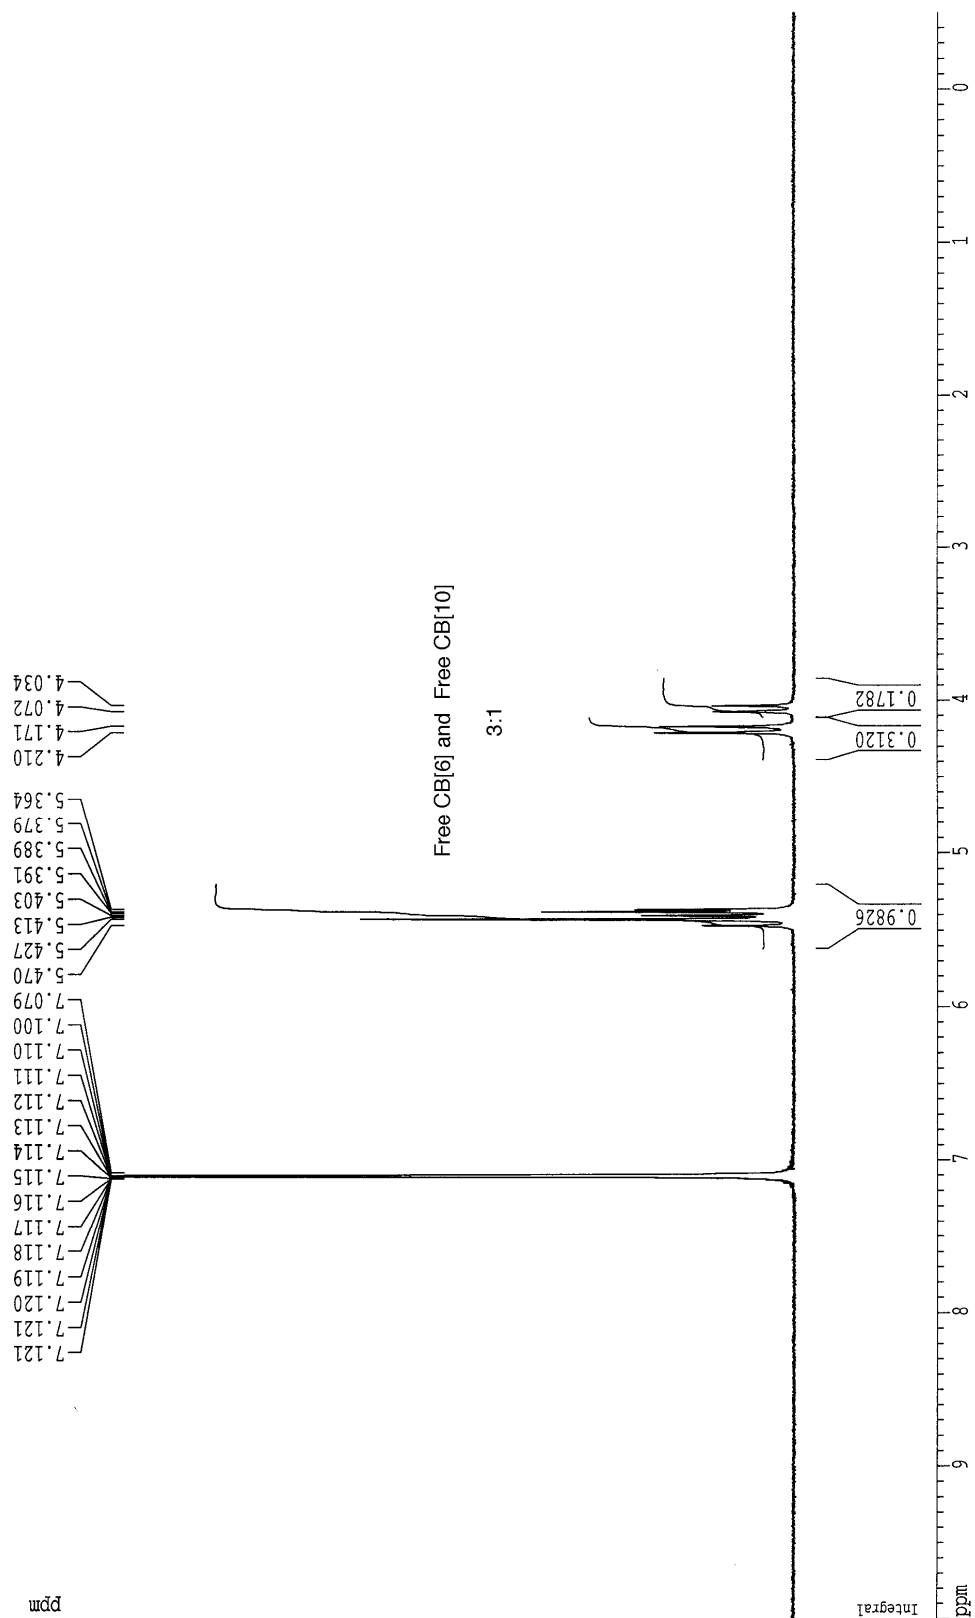

**Figure S9.**  $^1\text{H}$  NMR spectrum recorded (400 MHz, RT, 20% DCl /  $\text{D}_2\text{O}$ ) for a 3:1 mixture of CB[6] and CB[10]. CB[6] and CB[10] remain in their free states and do not form a complex.

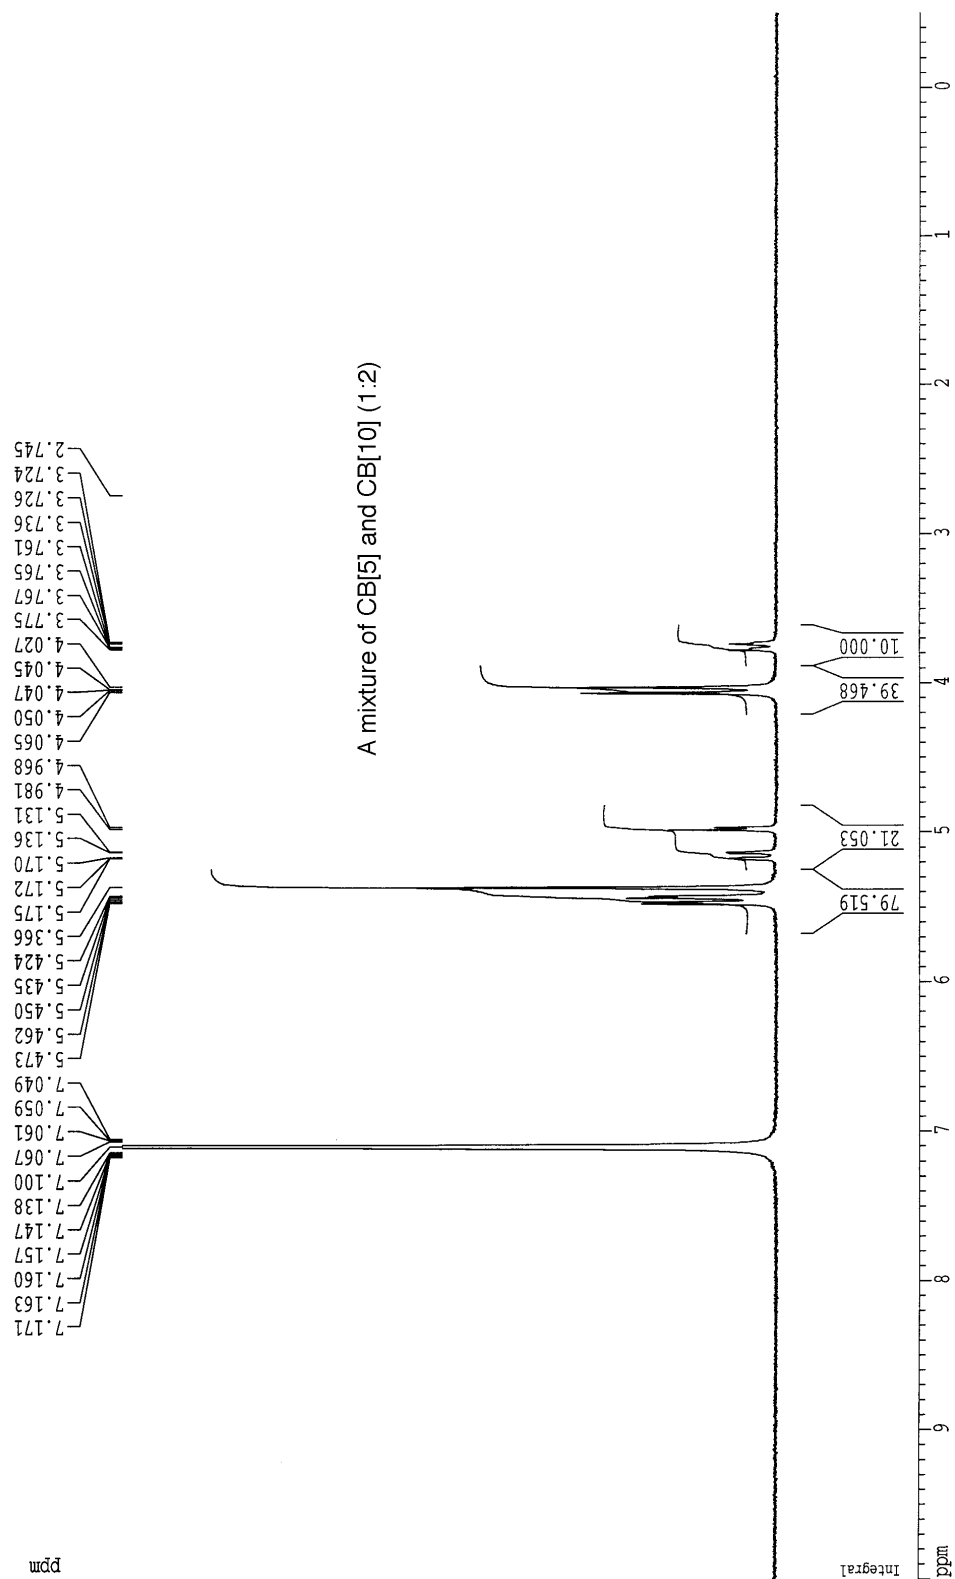

**Figure S10.**  $^1\text{H}$  NMR spectrum recorded (400 MHz, RT, 20%  $\text{DCI} / \text{D}_2\text{O}$ ) for a 1:2 mixture of purified CB[5] and CB[10]. Purified CB[10] retains the ability to bind CB[5]. Excess CB[10] is present as its free form.

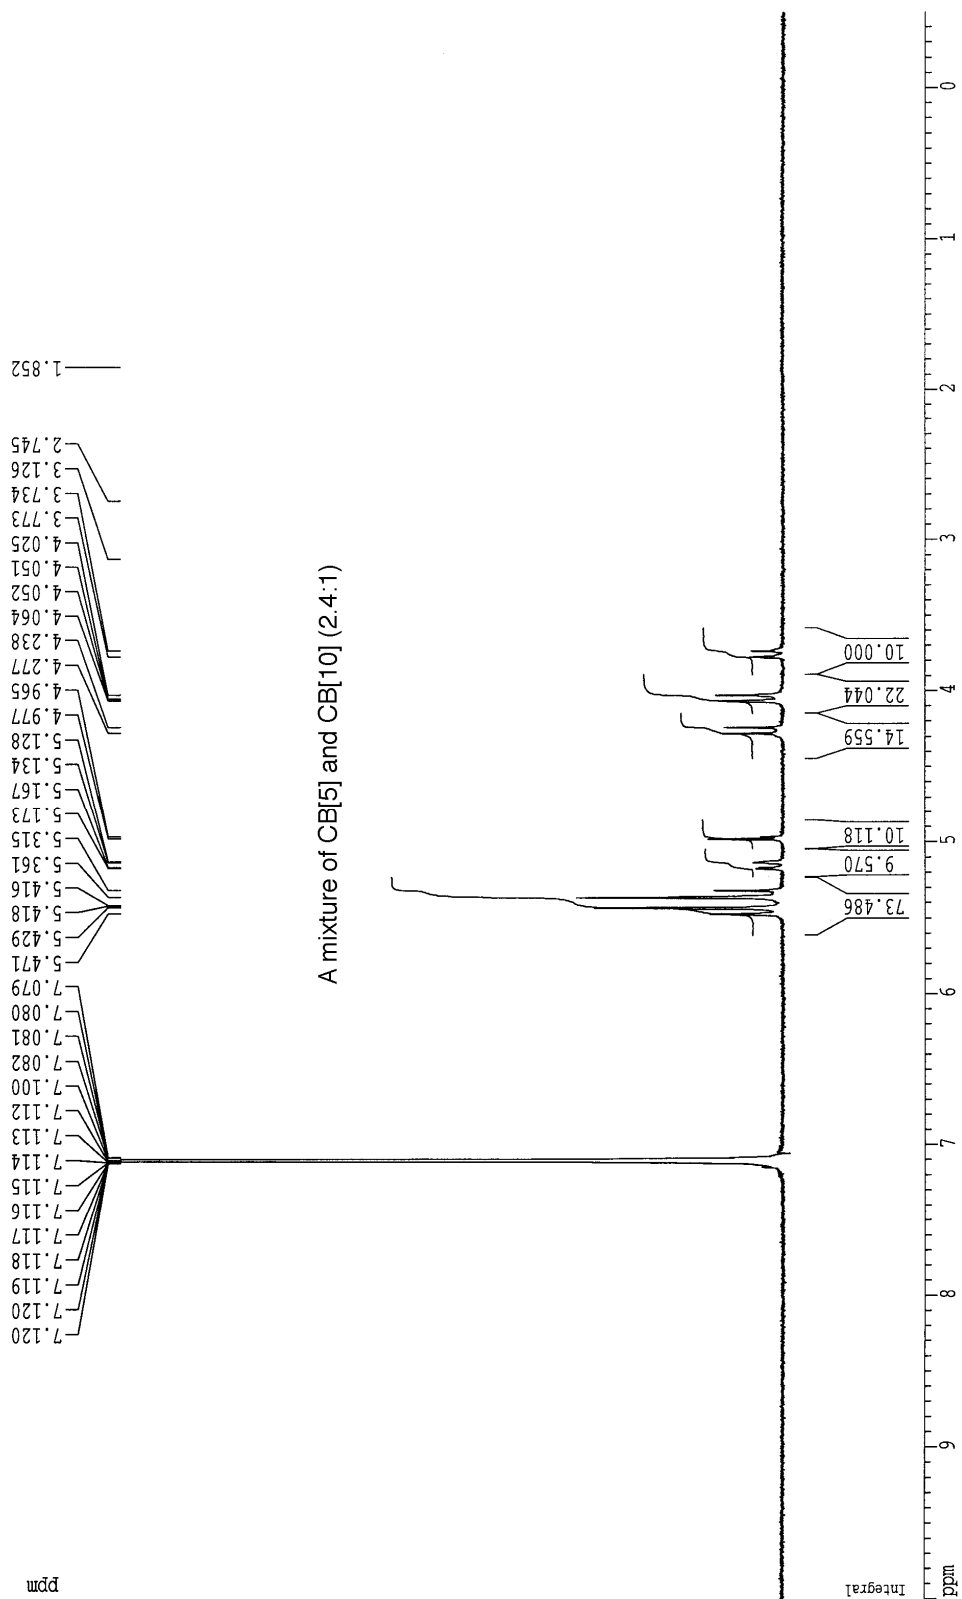

**Figure S11.**  $^1\text{H}$  NMR spectrum recorded (400 MHz, RT, 20% DCl /  $\text{D}_2\text{O}$ ) for a 2.4:1 mixture of purified CB[5] and CB[10]. Purified CB[10] retains the ability to bind CB[5]. Excess CB[5] is present as its free form.

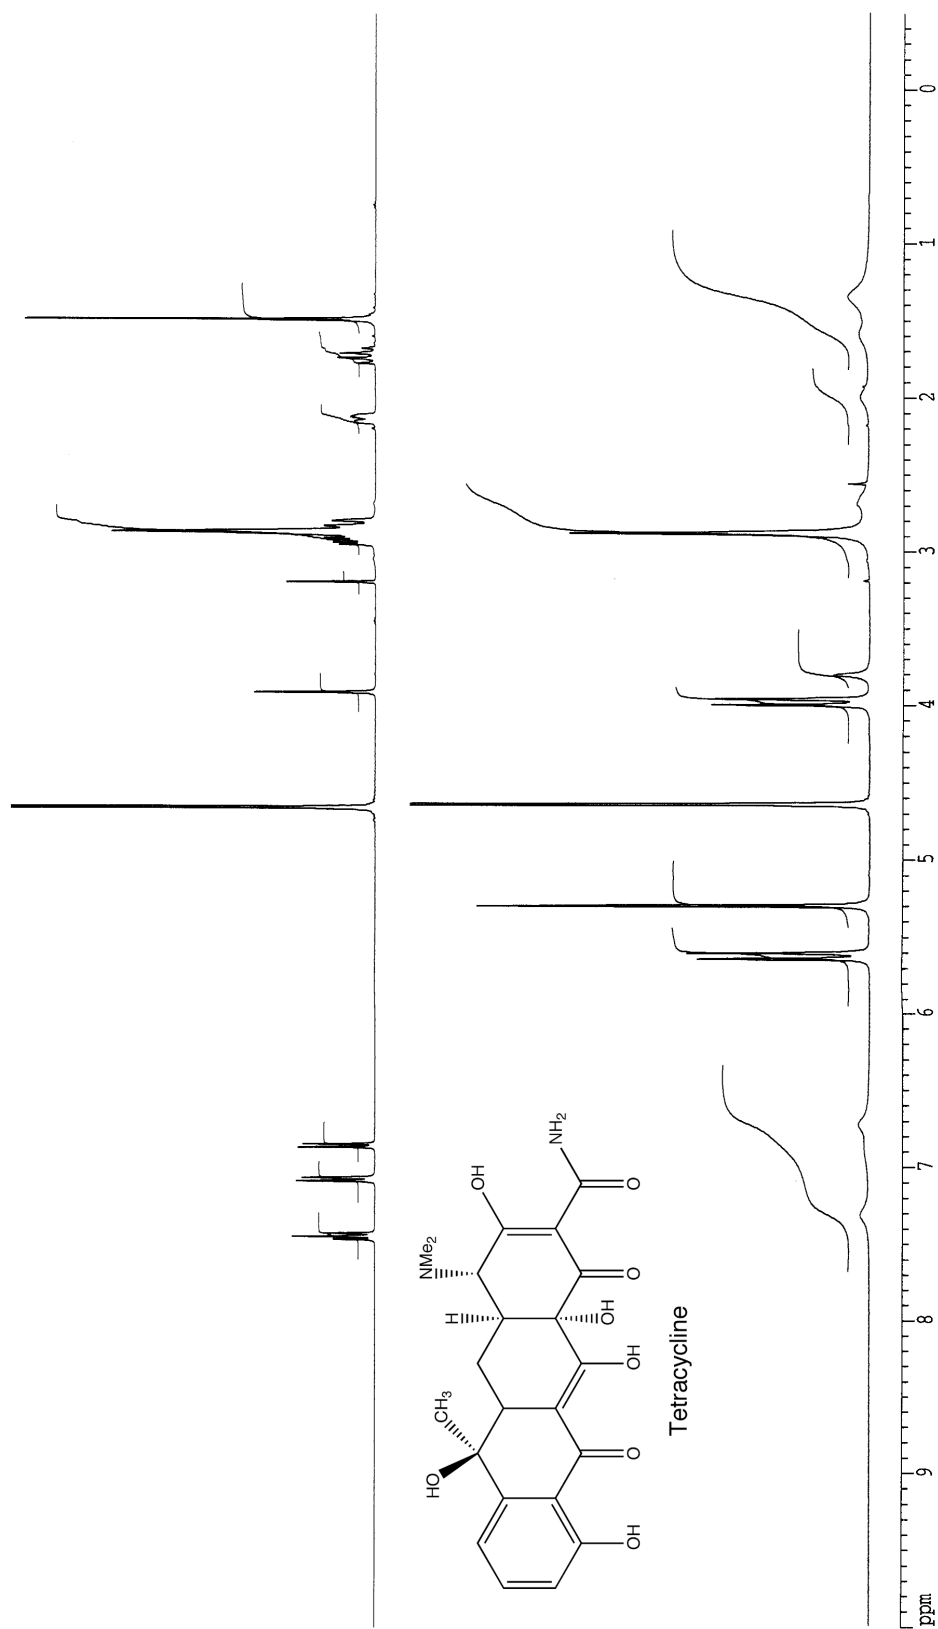

**Figure S12.** <sup>1</sup>H NMR spectrum recorded (400 MHz, RT, D<sub>2</sub>O) for tetracycline and a mixture of tetracycline and CB[10].

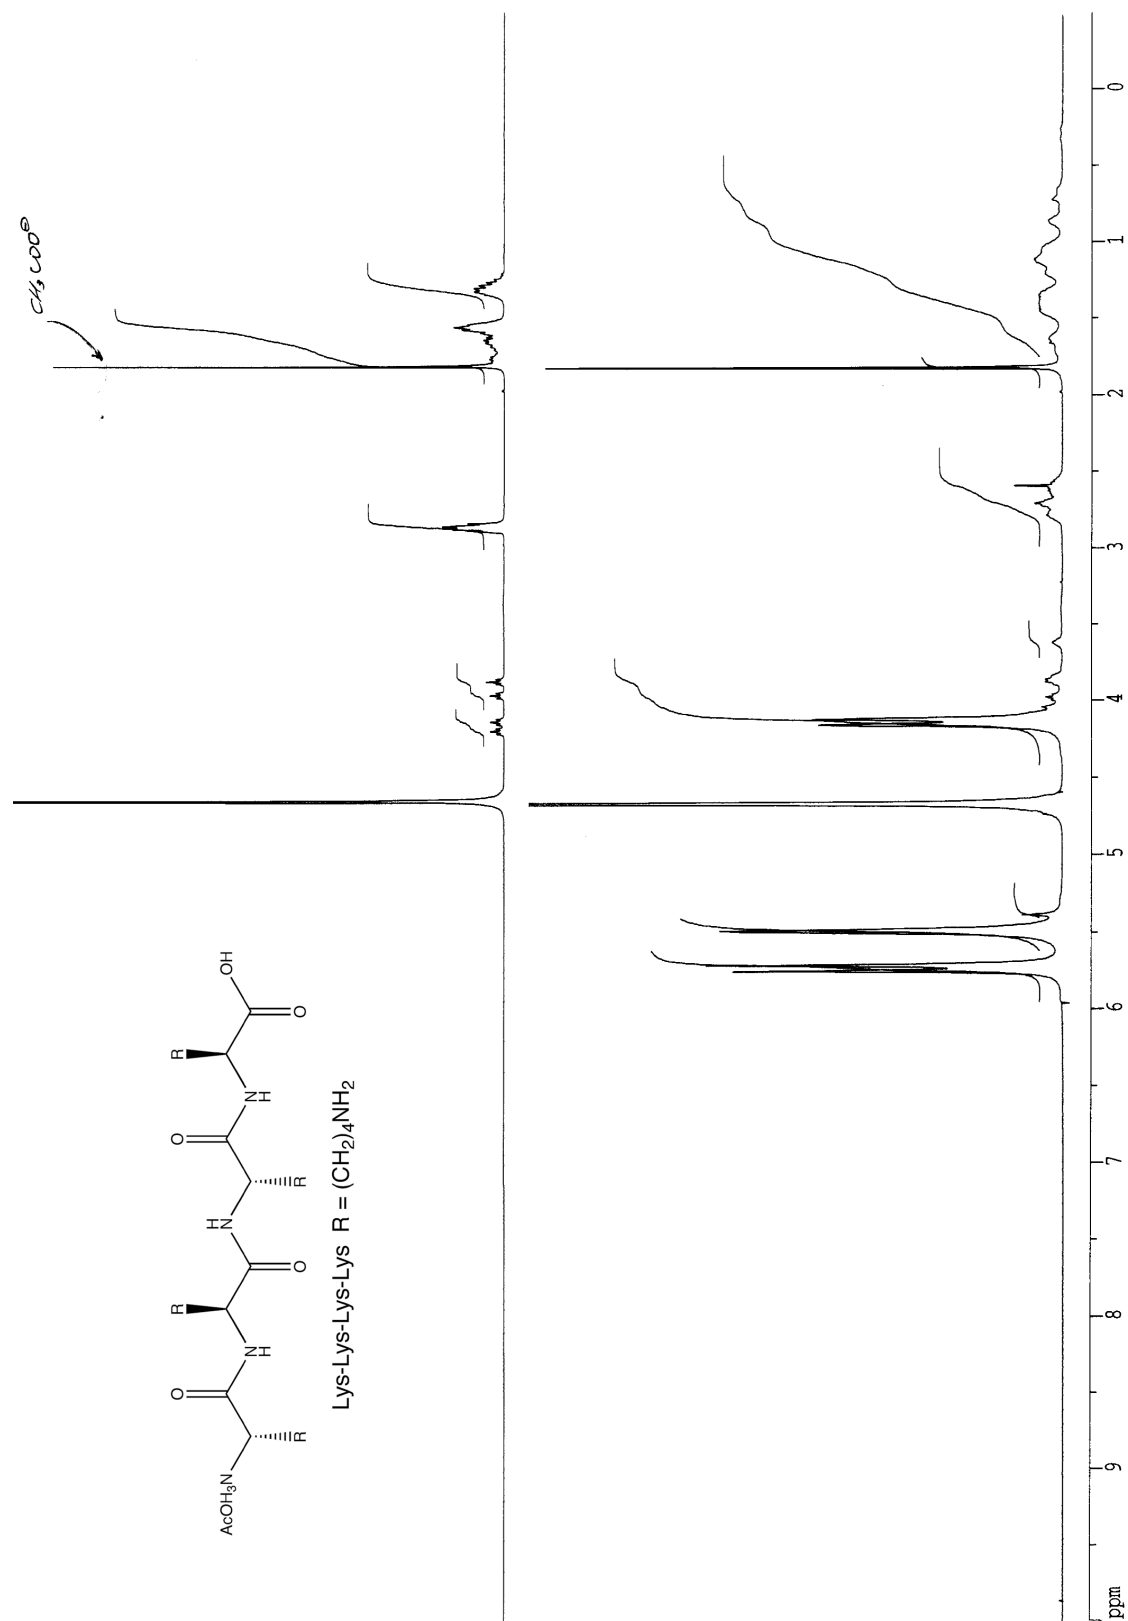

**Figure S13.**  $^1\text{H}$  NMR spectrum recorded (400 MHz, RT,  $\text{D}_2\text{O}$ ) for tetralysine and a mixture of tetralysine and CB[10].



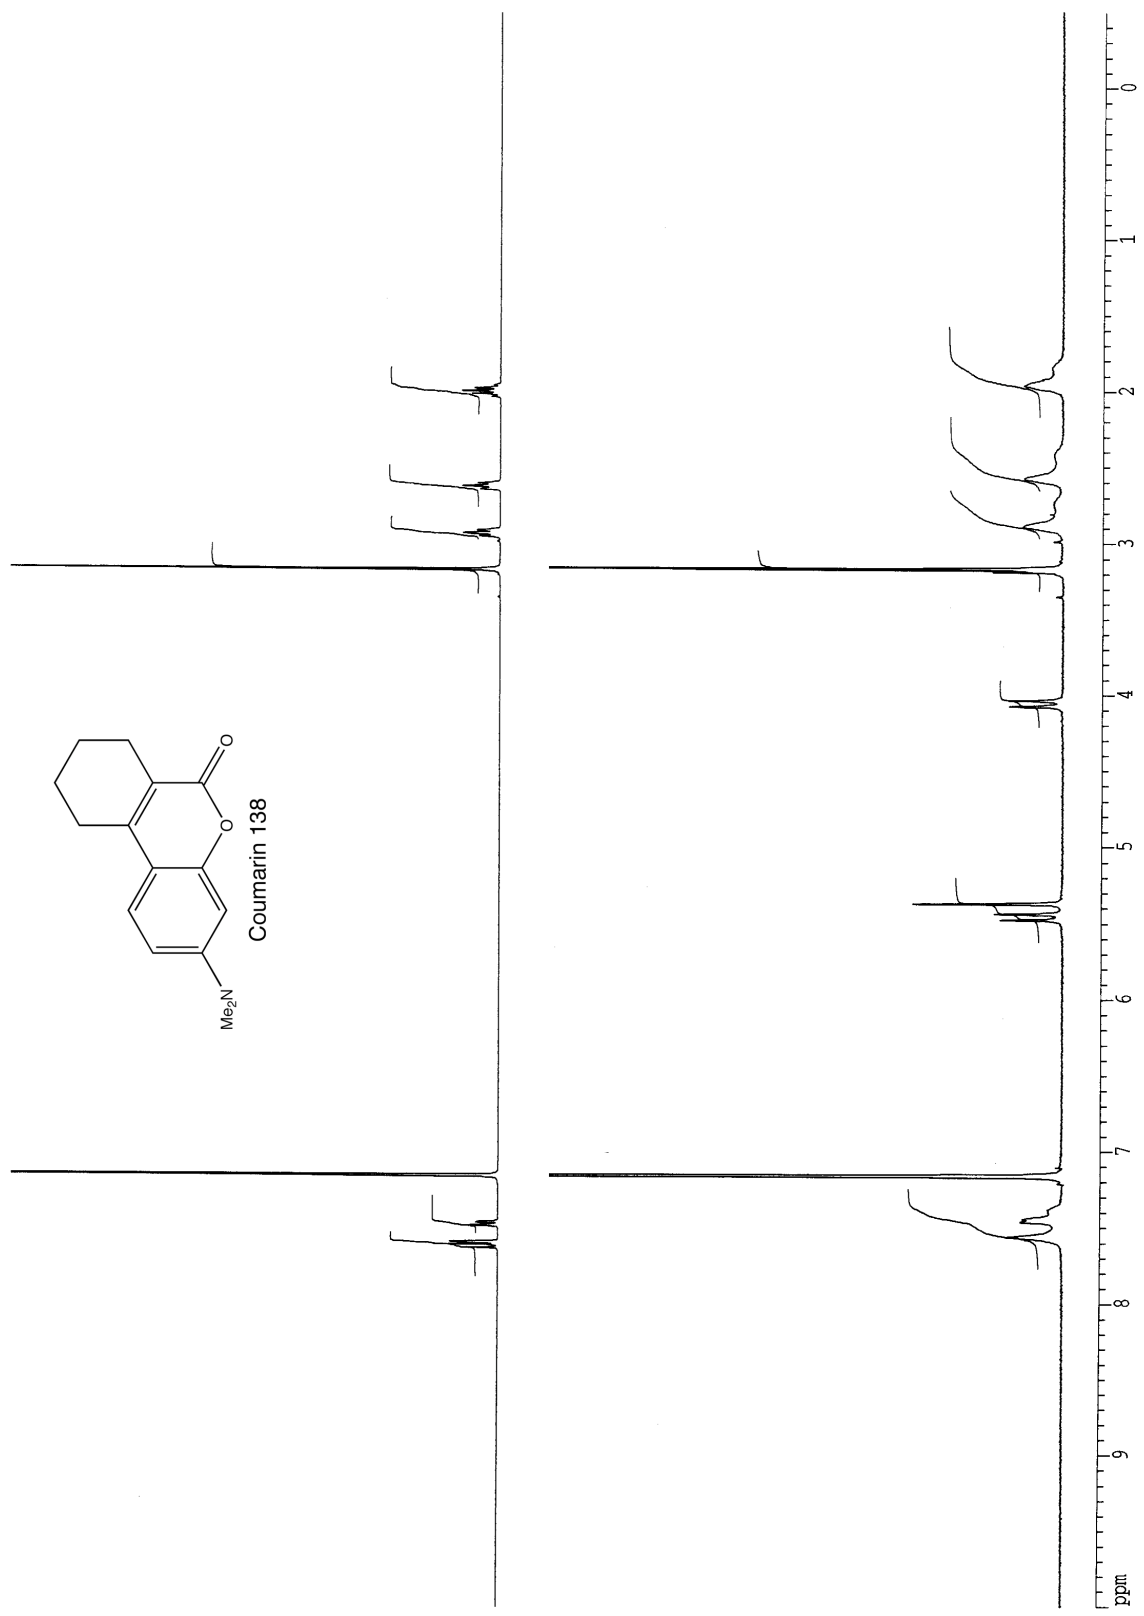

**Figure S14.**  $^1\text{H}$  NMR spectrum recorded (400 MHz, RT, 20% DCl /  $\text{D}_2\text{O}$ ) for coumarin 138 and a mixture of coumarin 138 and CB[10].

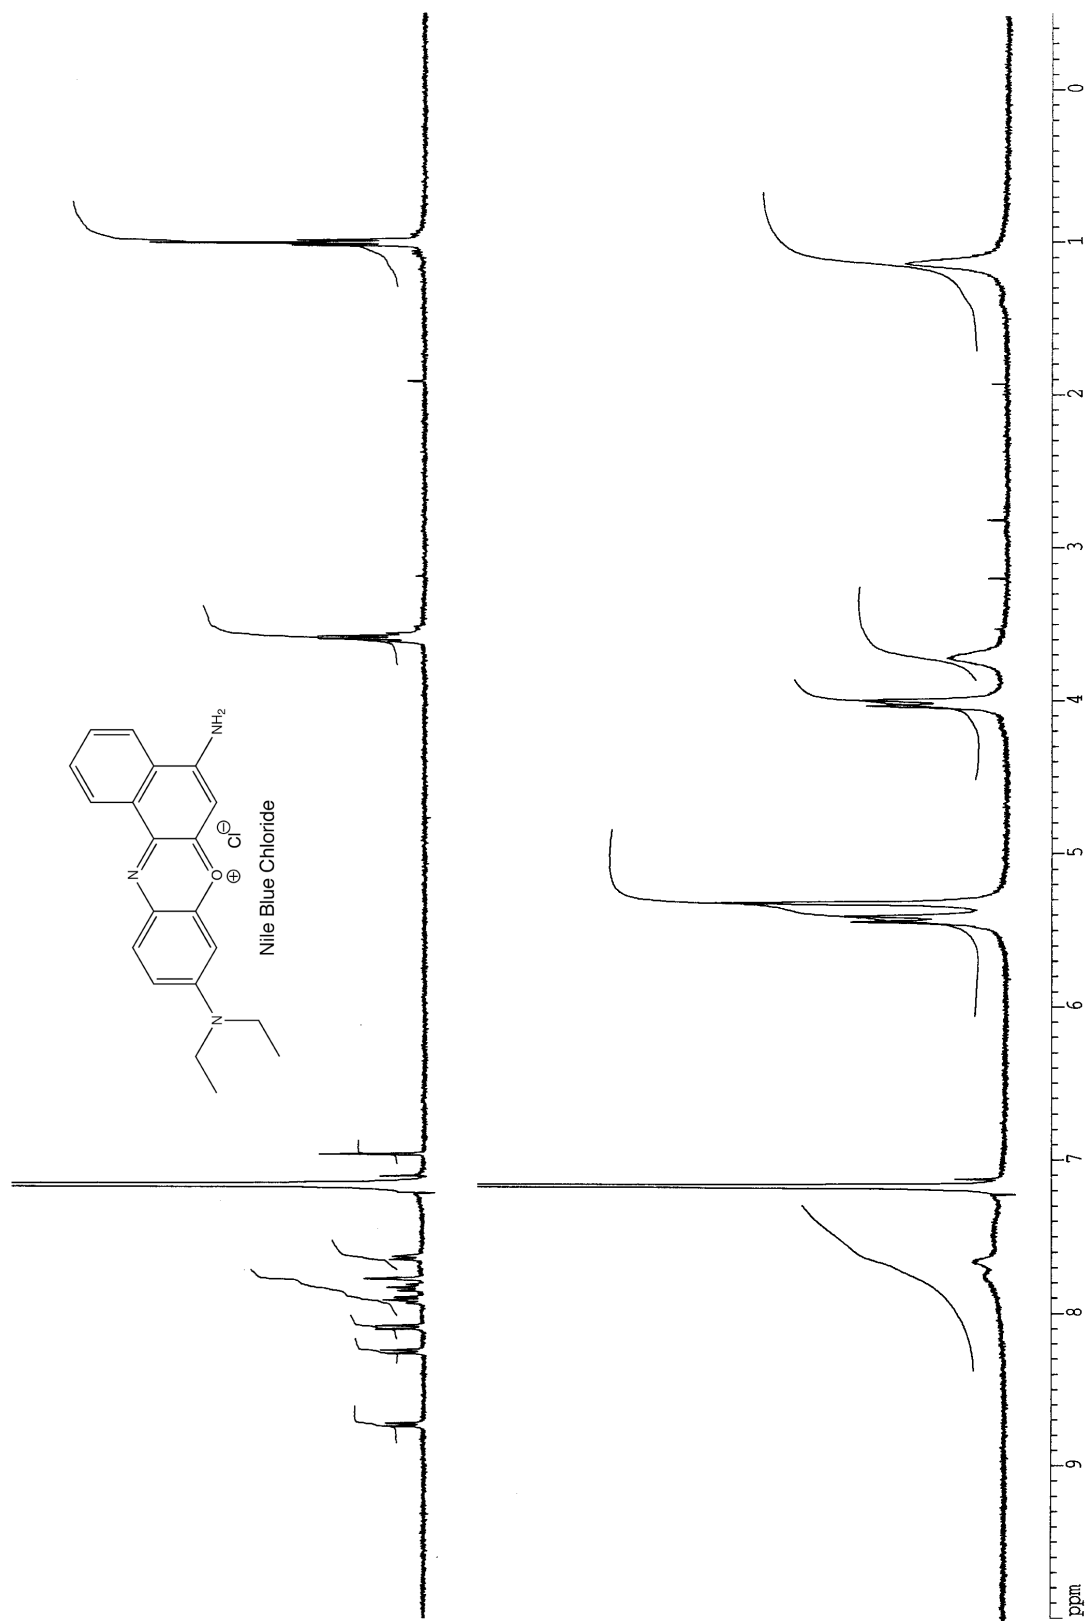

**Figure S15.**  $^1\text{H}$  NMR spectrum recorded (400 MHz, RT, 20% DCl /  $\text{D}_2\text{O}$ ) for Nile Blue and a mixture of Nile Blue and CB[10].

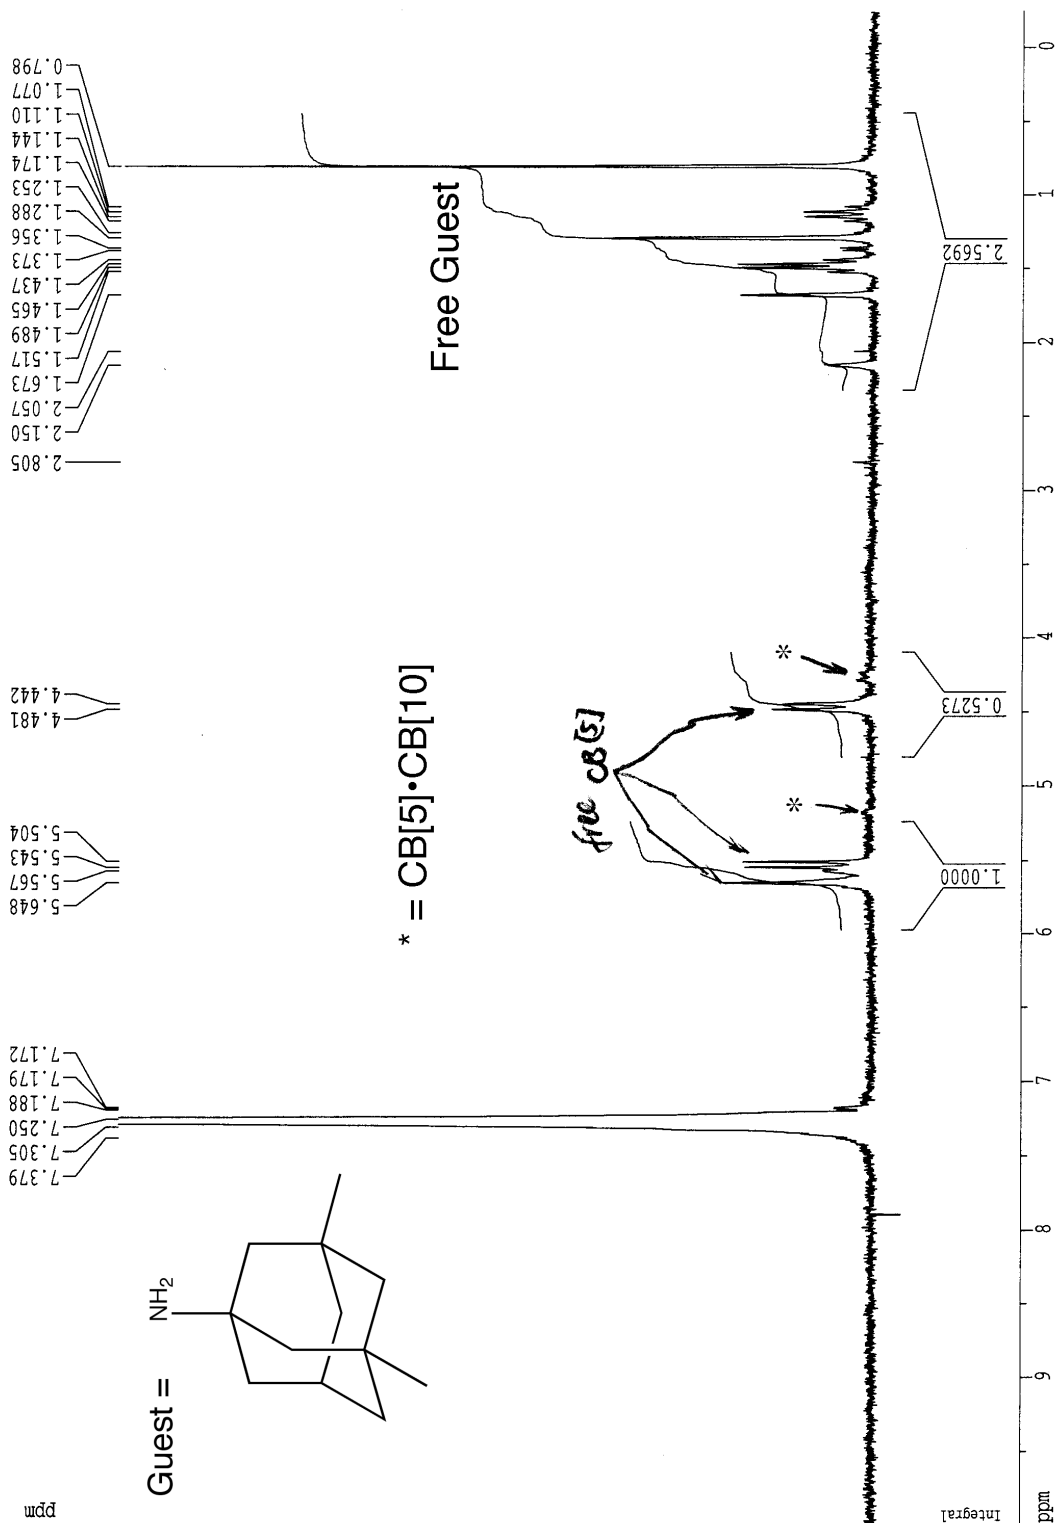

**Figure S16.**  $^1\text{H}$  NMR spectrum recorded (400 MHz, RT, 20%  $\text{DCI} / \text{D}_2\text{O}$ ) for a mixture of  $\text{CB}[10]\cdot\text{CB}[5]$  and 3,5-dimethyl-1-aminoadamantane. The guest displaces  $\text{CB}[5]$  from the  $\text{CB}[10]\cdot\text{CB}[5]$  complex. The  $\text{CB}[10]\cdot\text{CB}[5]$  complex is insoluble, precipitates from solution, and is not seen in the  $^1\text{H}$  NMR spectrum. Excess free guest and  $\text{CB}[5]$  remain in solution. \* = small amount of  $\text{CB}[10]\cdot\text{CB}[5]$

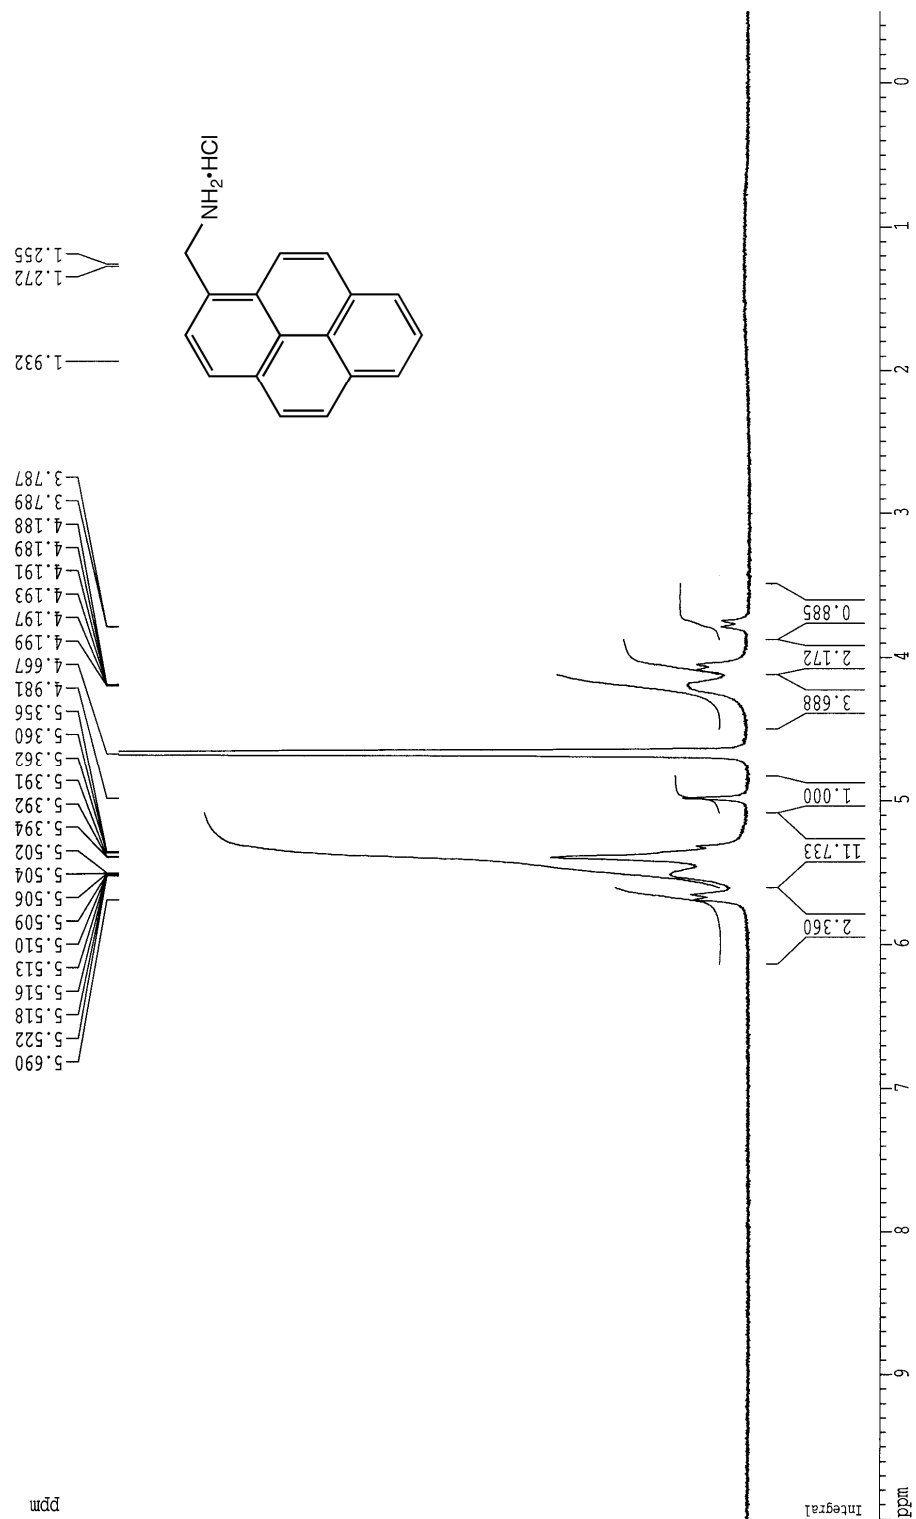

**Figure S17.**  $^1\text{H}$  NMR spectrum recorded (400 MHz, RT,  $\text{D}_2\text{O}$ ) for CB[10]•CB[5] after addition of  $\approx 0.8$  eq. pyrenemethylamine hydrochloride. The guest displaces CB[5] from the CB[10]•CB[5] complex. The CB[10]•pyrenemethylamine complex is insoluble, precipitates from solution, and is not seen in the  $^1\text{H}$  NMR spectrum. Displaced CB[5] and residual remain in solution. The broadness reflects chemical exchange between free and bound CB[5].

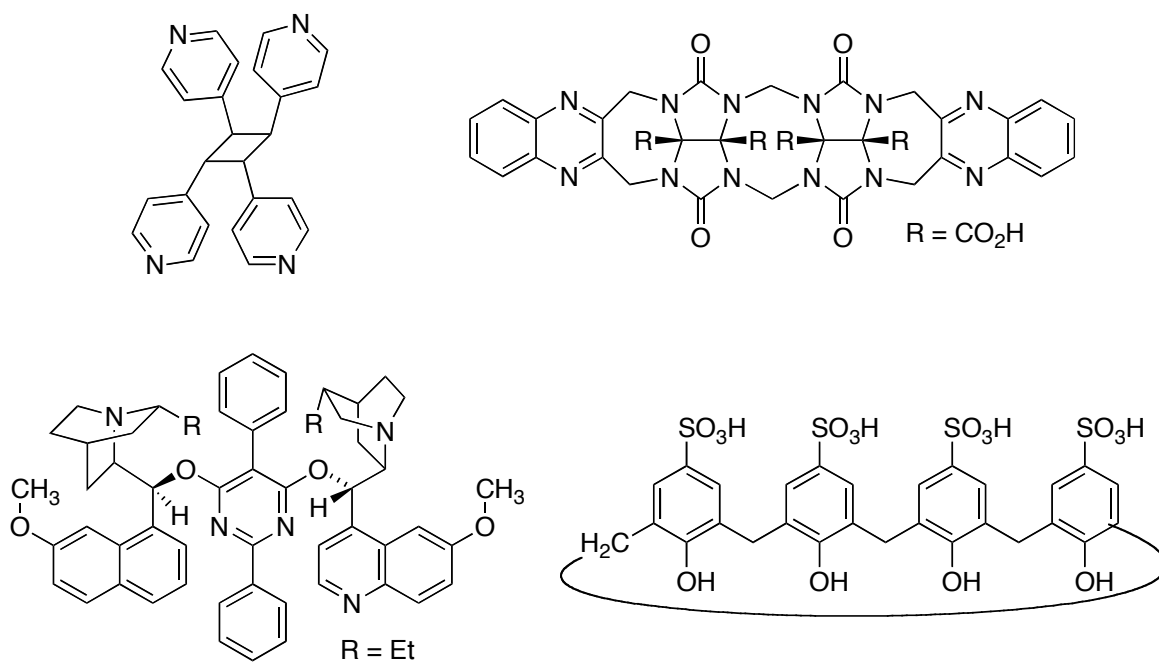

**Figure S18.** Chemical structures of some additional guests that do not form complexes with CB[10] in DCl / D<sub>2</sub>O solution.

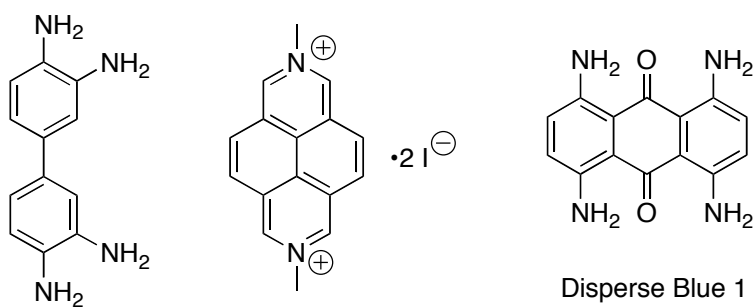

**Figure S19.** Chemical structures of some additional guests that form insoluble precipitates when mixed with CB[10] in DCl / D<sub>2</sub>O solution.

## Crystal Structure Information for UM # 1234

Issued by: Peter Y. Zavalij

Crystal No. & ID : 1234: Isaacs/Liu 1050B+KI #2 @ -40C redo from non-split crystal  
Compound name : CB10 @ bis-diammonium tetraiodide hydrate  
Chemical formula : (C<sub>60</sub> H<sub>60</sub> N<sub>40</sub> O<sub>20</sub>), (C<sub>17</sub> H<sub>21</sub> N<sub>7</sub> O)<sub>4</sub>, I<sub>8</sub>, (H<sub>2</sub> O)<sub>65.87</sub>  
Final R<sub>1</sub> [I>2σ(I)] : 8.74 %

---

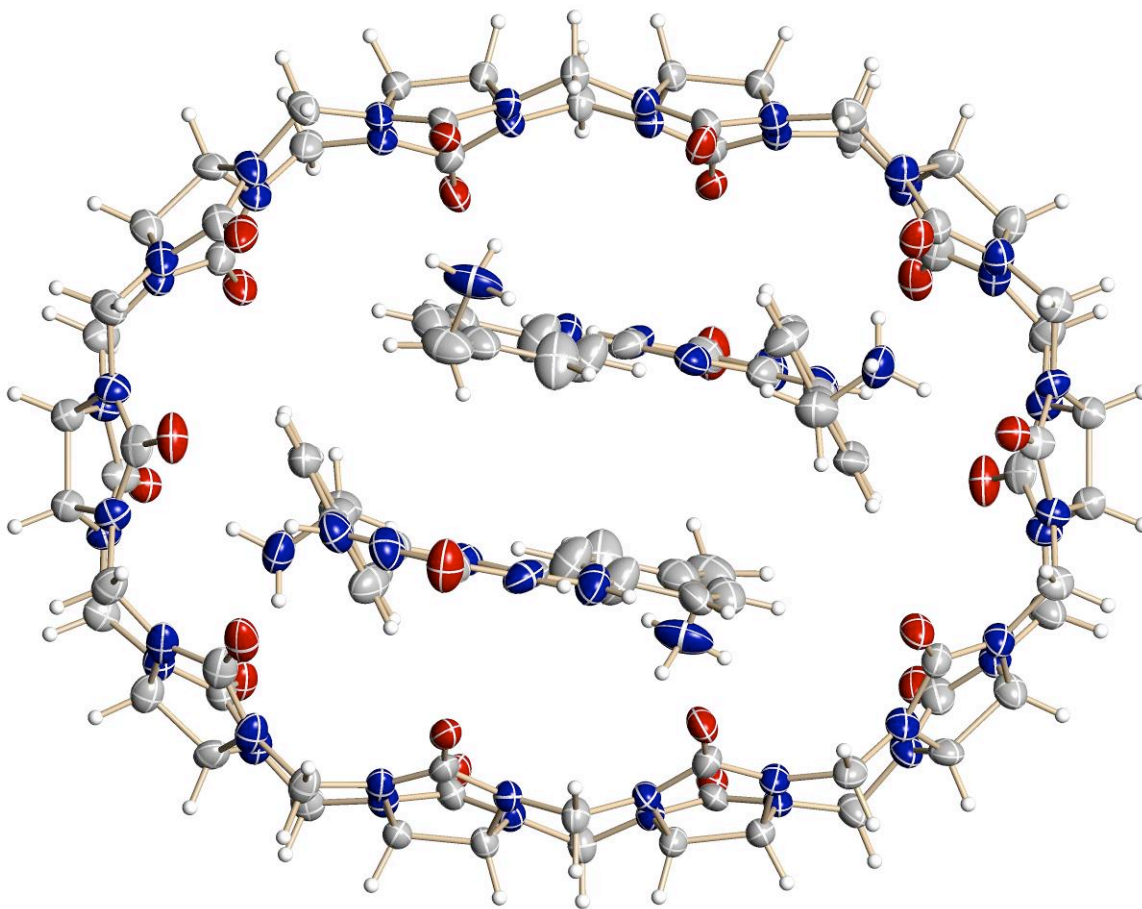

**Figure S20.** A view of a molecule of CB10@diamine2.14.nH<sub>2</sub>O from the crystal structure showing the numbering scheme employed. Anisotropic atomic displacement ellipsoids for the non-hydrogen atoms are shown at the 25% probability level. Hydrogen atoms are displayed with an arbitrarily small radius.

A colorless prism of C<sub>94</sub>H<sub>167.87</sub>I<sub>4</sub>N<sub>54</sub>O<sub>54.94</sub>, approximate dimensions 0.200 × 0.285 × 0.315 mm<sup>3</sup>, was used for the X-ray crystallographic analysis. The X-ray intensity data were measured at 233(2) K on a three-circle diffractometer system equipped with Bruker Smart1000 CCD area detector using a graphite monochromator and a MoK $\alpha$  fine-focus sealed tube ( $\lambda = 0.71073$  Å) operated at 50 kV and 40 mA. The detector was placed at a distance of 4.99 cm from the crystal.

A total of 1868 frames were collected with a scan width of 0.3° in  $\omega$  and an exposure time of 15 sec/frame using SMART (Bruker, 1999). The total data collection time was 11.5 hours. The frames were

integrated with SAINT software package using a narrow-frame integration algorithm. The integration of the data using a Orthorhombic unit cell yielded a total of 41685 reflections to a maximum  $\theta$  angle of  $22.50^\circ$ , of which 4924 were independent (completeness = 99.5%,  $R_{\text{int}} = 8.87\%$ ,  $R_{\text{sig}} = 5.06\%$ ) and 3619 were greater than  $2\sigma(I)$ . The final cell dimensions of  $a = 19.476(4) \text{ \AA}$ ,  $b = 20.192(4) \text{ \AA}$ ,  $c = 18.567(4) \text{ \AA}$ ,  $\alpha = 90^\circ$ ,  $\beta = 90^\circ$ ,  $\gamma = 90^\circ$ ,  $V = 7302(3) \text{ \AA}^3$ , are based upon the refinement of the XYZ-centroids of 5532 reflections with  $2.3 < \theta < 21.0^\circ$  using SAINT. Analysis of the data showed 1.52 % decay during data collection. Data were corrected for absorption effects with the Semi-empirical from equivalents method using SADABS (Sheldrick, 1996). The minimum and maximum transmission coefficients were 0.680 and 0.826.

The structure was solved and refined using the SHELXS-97 (Sheldrick, 1990) and SHELXL-97 (Sheldrick, 1997) software in the space group  $Pn\bar{m}$  with  $Z = 2$  for the formula unit  $\text{C}_{94}\text{H}_{167.87}\text{I}_4\text{N}_{54}\text{O}_{54.94}$ . The final anisotropic full-matrix least-squares refinement on  $F^2$  with 623 variables converged at  $R_1 = 8.74\%$  for the observed data and  $wR_2 = 23.75\%$  for all data. The goodness-of-fit was 1.001. The largest peak on the final difference map was  $2.632 \text{ e}^-/\text{\AA}^3$  and the largest hole was  $-1.003 \text{ e}^-/\text{\AA}^3$ . On the basis of the final model, the calculated density was  $1.565 \text{ g/cm}^3$  and  $F(000)$ ,  $3523 \text{ e}^-$ .

**Table S1.** Sample and crystal data for CB10@diamine2.I4.nH2O.

|                               |                                                                                       |                     |
|-------------------------------|---------------------------------------------------------------------------------------|---------------------|
| X-ray labbook No.             | 1234                                                                                  |                     |
| Crystal ID                    | Isaacs/Liu 1050B+KI #2 @ -40C redo from non-split crystal                             |                     |
| Empirical formula             | C <sub>94</sub> H <sub>167.87</sub> I <sub>4</sub> N <sub>54</sub> O <sub>54.94</sub> |                     |
| Formula weight                | 3441.25                                                                               |                     |
| Temperature                   | 233(2) K                                                                              |                     |
| Wavelength                    | 0.71073 $\text{\AA}$                                                                  |                     |
| Crystal size                  | 0.315 × 0.285 × 0.200 mm <sup>3</sup>                                                 |                     |
| Crystal habit                 | colorless prism                                                                       |                     |
| Crystal system                | Orthorhombic                                                                          |                     |
| Space group                   | Pn $\bar{m}$                                                                          |                     |
| Unit cell dimensions          | $a = 19.476(4) \text{ \AA}$                                                           | $\alpha = 90^\circ$ |
|                               | $b = 20.192(4) \text{ \AA}$                                                           | $\beta = 90^\circ$  |
|                               | $c = 18.567(4) \text{ \AA}$                                                           | $\gamma = 90^\circ$ |
| Volume                        | 7302(3) $\text{\AA}^3$                                                                |                     |
| Z                             | 2                                                                                     |                     |
| Density, $\rho_{\text{calc}}$ | 1.565 g/cm <sup>3</sup>                                                               |                     |
| Absorption coefficient, $\mu$ | 0.957 mm <sup>-1</sup>                                                                |                     |
| F(000)                        | 3523 $\bar{\text{e}}$                                                                 |                     |

**Table S2.** Data collection and structure refinement for CB10@diamine2.I4.nH2O.

|                                       |                                                                                      |
|---------------------------------------|--------------------------------------------------------------------------------------|
| Diffractometer                        | Bruker Smart1000 CCD area detector                                                   |
| Radiation source                      | fine-focus sealed tube, MoK $\alpha$                                                 |
| Generator power                       | 50 kV, 40 ma                                                                         |
| Detector distance                     | 4.99 cm                                                                              |
| Detector resolution                   | 8.33 pixels/mm                                                                       |
| Total frames                          | 1868                                                                                 |
| Frame size                            | 512 pixels                                                                           |
| Frame width                           | 0.3 °                                                                                |
| Exposure per frame                    | 15 sec                                                                               |
| Total measurement time                | 11.5 hours                                                                           |
| Data collection method                | $\omega$ scans                                                                       |
| $\theta$ range for data collection    | 2.19 to 22.50°                                                                       |
| Index ranges                          | $-20 \leq h \leq 20, -21 \leq k \leq 21, -19 \leq l \leq 19$                         |
| Reflections collected                 | 41685                                                                                |
| Independent reflections               | 4924                                                                                 |
| Observed reflection, $I > 2\sigma(I)$ | 3619                                                                                 |
| Coverage of independent reflections   | 99.5 %                                                                               |
| Variation in check reflections        | 1.52 %                                                                               |
| Absorption correction                 | Semi-empirical from equivalents<br>SADABS (Sheldrick, 1996)                          |
| Max. and min. transmission            | 0.826 and 0.680                                                                      |
| Structure solution technique          | direct                                                                               |
| Structure solution program            | SHELXS-97 (Sheldrick, 1990)                                                          |
| Refinement technique                  | Full-matrix least-squares on $F^2$                                                   |
| Refinement program                    | SHELXL-97 (Sheldrick, 1997)                                                          |
| Function minimized                    | $\sum w(F_o^2 - F_c^2)^2$                                                            |
| Data / restraints / parameters        | 4924 / 283 / 623                                                                     |
| Goodness-of-fit on $F^2$              | 0.980                                                                                |
| $\Delta/\sigma_{\max}$                | 0.000                                                                                |
| Final R indices:                      |                                                                                      |
| $R_1, I > 2\sigma(I)$                 | 0.0874                                                                               |
| $wR_2, \text{all data}$               | 0.2375                                                                               |
| $R_{\text{int}}$                      | 0.0887                                                                               |
| $R_{\text{sig}}$                      | 0.0506                                                                               |
| Weighting scheme                      | $w = 1/[\sigma^2(F_o^2) + (0.06P)^2 + 122.7P],$<br>$P = [\max(F_o^2, 0) + 2F_o^2]/3$ |
| Largest diff. peak and hole           | 2.632 and $-1.003 \bar{e}/\text{\AA}^3$                                              |

$$R_1 = \sum ||F_o| - |F_c|| / \sum |F_o|, \quad wR_2 = [\sum w(F_o^2 - F_c^2)^2 / \sum w(F_o^2)^2]^{1/2}$$
